# Supplementary material for: Global burden of cancer in 2020 attributable to alcohol consumption: a population-based study
Source: PubMed Central journal article supplement — Lancet Oncol. 2021 Aug;22(8):1071–80. doi: 10.1016/S1470-2045(21)00279-5 (PMC8324483; doi:10.1016/s1470-2045(21)00279-5), 2021-08
Supplement: mmc1.pdf [file mmc1.pdf]

# THE LANCET Oncology

## Supplementary appendix

This appendix formed part of the original submission and has been peer reviewed.  
We post it as supplied by the authors.

Supplement to: Runggay H, Shield K, Charvat H, et al. Global burden of cancer in 2020 attributable to alcohol consumption: a population-based study. *Lancet Oncol* 2021; published online July 13. [http://dx.doi.org/10.1016/S1470-2045\(21\)00279-5](http://dx.doi.org/10.1016/S1470-2045(21)00279-5).

## Contents

|                                                                                                                                                                                                                                                 |    |
|-------------------------------------------------------------------------------------------------------------------------------------------------------------------------------------------------------------------------------------------------|----|
| Supplemental methods.....                                                                                                                                                                                                                       | 2  |
| Study design.....                                                                                                                                                                                                                               | 2  |
| Selection of cancer sites and national incidence estimates.....                                                                                                                                                                                 | 2  |
| Cancer risks related to alcohol consumption.....                                                                                                                                                                                                | 2  |
| Global prevalence of alcohol consumption.....                                                                                                                                                                                                   | 3  |
| Estimation of population attributable fraction.....                                                                                                                                                                                             | 4  |
| Estimates of uncertainty.....                                                                                                                                                                                                                   | 5  |
| Appendix table 1. Summary of the classifications of evidence for a causal relationship between alcohol consumption and the risk of cancer by cancer site and organisation.....                                                                  | 6  |
| Appendix table 2. Relative risks and variance used for the alcohol-attributable fraction calculations.....                                                                                                                                      | 7  |
| Appendix table 3. Global number of alcohol-attributable cancer cases, population attributable fraction, and age-standardised incidence rate of alcohol-attributable cases in 2020, by world region, Human Development Index, and sex.....       | 9  |
| Appendix table 4. Number of alcohol-attributable cancer cases, population attributable fraction, and age-standardised incidence rate of alcohol-attributable cases in 2020, by country and sex. Number of cases suppressed if less than five... | 11 |
| Appendix table 5. Global number of alcohol-attributable cancer cases in 2020, by alcohol consumption category, world region, Human Development Index, and sex. Number of cases suppressed if less than five.....                                | 26 |
| Appendix table 6. Global number of alcohol-attributable cancer cases, by 10 g per day increase in alcohol consumption and sex.....                                                                                                              | 30 |
| Appendix figure 1. Dose-response meta-analysis per 10 g per day of alcohol intake and liver cancer stratified by hepatocellular carcinoma (HCC) or total liver cancer.....                                                                      | 31 |
| Appendix figure 2. Cancers attributable to alcohol consumption according to cancer site in males, females, and both sexes combined, in 2020.....                                                                                                | 32 |
| Appendix figure 3. Population attributable fraction and age-standardised incidence rate of alcohol-attributable cancer cases in both sexes combined in 2020, by country.....                                                                    | 33 |
| Appendix figure 4. Age-standardised incidence rate (ASIR) of alcohol-attributable cancer cases by alcohol consumption category, sex, and world region.....                                                                                      | 34 |
| Appendix figure 5. Cancers attributable to alcohol consumption according to cancer site and region, both sexes combined, in 2020.....                                                                                                           | 35 |
| References.....                                                                                                                                                                                                                                 | 36 |

## **Supplemental methods**

### **Study design**

In this population-based study we calculated the impact of alcohol consumption on the incidence of cancer worldwide in 2020 using a Levin-based population attributable fraction (PAF) method<sup>1</sup> adapted from Shield et al. 2020<sup>2</sup>, and based on a theoretical minimum-risk exposure of lifetime abstention from alcohol consumption. PAFs were estimated by combining data on alcohol consumption and the relative risk (RR) of developing cancer. Due to a delay between alcohol consumption and possible development of cancer, it is necessary to factor in a latency period between the year of alcohol exposure data and the year of cancer outcome. A 10-year latency period between exposure and cancer diagnosis was chosen based on an observed approximate latency period of 11 to 12 years for breast, colorectal, oral cavity, oesophageal (squamous cell carcinoma) and pharyngeal cancers and 8 to 9 years for laryngeal and liver cancers in a previous Canadian study,<sup>3</sup> and has been used in other PAF studies.<sup>2,4</sup>

### **Selection of cancer sites and national incidence estimates**

The selection of cancers included in this study was based on the most recent International Agency for Research on Cancer (IARC) monograph on personal habits for cancer types with sufficient evidence of a causal relationship with the consumption of alcoholic beverages (appendix p 6).<sup>5</sup> The underlying cancer incidence estimates were taken from the GLOBOCAN 2020 database which models global burden of primary cancers based on data from several sources;<sup>6</sup> high-quality cancer registry data, new sources in sub-Saharan Africa retrieved through the African Cancer Registry Network, targeted searches for new registry data online, and the most recent mortality data from the WHO.<sup>7</sup> For countries where high-quality population-based cancer registry data were lacking, complex methods incorporating other data sources such as national mortality records and averages from neighbouring countries were used.

Country-specific estimates of cancer cases for 2020 by sex and five-year age group (from 0–4 to 85 years of age and over) were obtained for: lip and oral cavity cancer (International Statistical Classification of Diseases and Related Health Problems, 10th revision [ICD-10] C00-06); pharyngeal cancer (C09-10, C12-C13); oesophageal cancer (C15); colon cancer (C18); rectal cancer (C19-20); liver cancer (C22); laryngeal cancer (C32); breast cancer (C50, only female); and all cancers combined excluding non-melanoma skin cancer (C00-C97 excl. C44). Due to the specific causality with hepatocellular carcinoma (HCC) and oesophageal squamous cell carcinoma (SCC), estimates of HCC (International Classification of Diseases for Oncology, 3rd edition [ICD-O-3] morphology codes 8170-8175) and oesophageal SCC (ICD-O-3 8050-8078, 8083-8084) were obtained from two studies that have estimated cases based on observed distributions of the histological subtypes of liver and oesophageal cancer using cancer registry data (liver cancer results: Rumgay H, unpublished).<sup>8</sup> We included cancers of the stomach (C16) and pancreas (C25) in sensitivity analysis due to evidence suggesting a causal association with alcohol consumption in World Cancer Research Fund (WCRF) classifications but a lack of sufficient evidence in the IARC monograph classification (appendix p 6).<sup>5,9</sup> In our aim to quantify the burden of avoidable cancers we did not include the potential reduction in kidney cancer incidence despite probable evidence of a protective effect from alcohol intake of up to 30 g/day.<sup>9</sup>

### **Cancer risks related to alcohol consumption**

For each cancer type included we took risk estimates for the association with alcohol consumption (measured per 10 grams increase in alcohol [as ethanol] consumed per day) from the systematic literature reviews conducted as part of the WCRF Continuous Update Project (appendix p 7).<sup>9</sup> To obtain the HCC-specific risk estimate we conducted a random-

effects meta-analysis selecting the RRs from studies with HCC as the outcome which were presented in the liver cancer systematic literature review (appendix p 31).<sup>10</sup> The variance of the linear RRs was calculated from their 95% confidence intervals. Due to the presence of a non-linear dose-response curve for oesophageal SCC, the RR function and variance-covariance matrix for oesophageal SCC risk were taken from Shield et al.,<sup>2</sup> originally obtained from Bagnardi et al. 2015.<sup>11</sup> The risks of colon and rectum cancers were modelled for alcohol consumption above 20 g per day based on the non-linear dose-response curve showing no significant increased risk of colorectal cancer at less than 20 g per day in the WCRF Continuous Update Project systematic review for colorectal cancer.<sup>12</sup> Similarly, the risks of pancreatic cancer and stomach cancer were modelled for alcohol consumption above 45 g per day only due to the decision made by WCRF that conclusions below this intake were not possible.<sup>9</sup> Former drinking was included in sensitivity analysis using sex-specific RRs from the WCRF Continuous Update Project report<sup>10</sup> for liver cancer, Schütze et al.<sup>13</sup> for colon and rectal cancer, Marron et al.<sup>14</sup> for upper aerodigestive cancers, and Corrao et al.<sup>15</sup> for pancreas and stomach cancers, as previously described by Shield and colleagues.<sup>2</sup>

In terms of cancer risk by type of alcoholic beverage, there is little-to-no observed difference in the risk of cancer between consumption of beers, wines or spirits.<sup>9</sup> With regards to differences by drinking patterns and the potential effect of heavy episodic drinking or binge drinking on cancer risk, it is believed that it is the total average intake of alcohol which is most at play with no difference whether this is spread over several occasions or consumed all at once.<sup>16</sup> Further on drinking patterns, the risk of cancer may vary by changes in patterns of drinking over the life-course, or alcohol consumption trajectory, in individuals; a cohort study in Thailand with more than 30 years of follow-up observed double the cancer mortality in those who were consistent-regular drinkers throughout their life compared with consistent-occasional drinkers,<sup>17</sup> but the risk of cancer among former heavy drinkers was not discussed. Cancer risk among former drinkers may vary by intensity and duration of past drinking. In our analysis we were not able to distinguish these discrepancies in the alcohol consumption data, although there is evidence that the elevated risk of head and neck cancer in former drinkers reduces back to that of lifetime abstainers after 20 years of quitting.<sup>14</sup>

### **Global prevalence of alcohol consumption**

Alcohol consumption estimates for 2010 were obtained from the Global Information System on Alcohol and Health as adult per capita alcohol consumption in litres of alcohol per year by country disaggregated by age (15–19, 20–24, 25–34, 35–49, 50–64, and 65 years of age and older) and sex.<sup>18</sup> The per capita alcohol consumption data, i.e. population level alcohol exposure data, were derived from three sources: recorded, unrecorded, and tourist per capita alcohol consumption. Recorded per capita data were based on production, sales, and taxation statistics;<sup>19</sup> unrecorded per capita data were based on population surveys and expert opinion (measured through Delphi analysis).<sup>20</sup>; and tourist per capita data were derived based on data from the World Tourism Organization. Per capita alcohol consumption estimates were corrected by a factor of 0.8 to take into account alcohol not consumed (wastage) and the under-reporting of alcohol consumption from population-based surveys being larger than that in risk relations studies;<sup>21</sup> this correction factor of 0.8 was found to be appropriate by a recent systematic review of coverage of per capita alcohol consumption recorded in population surveys compared with that recorded in risk relations studies.<sup>22</sup>

The distribution of daily adult alcohol consumption among past year drinkers was estimated using the methodology developed by Rehm and colleagues,<sup>23</sup> and Kehoe and colleagues,<sup>24</sup> whereby alcohol consumption distributions can be modelled using a Gamma distribution. This method assumes that there is a strong correlation between the mean and the standard deviation of the Gamma distribution where the standard deviation of the Gamma distribution for alcohol

consumption can be accurately estimated based on the mean of the Gamma distribution. We then estimated the scale and the shape parameter from the mean ( $\mu$ ) and the standard deviation ( $\sigma$ ) of the Gamma distribution using Formula 1.

*Formula 1*

$$\sigma = (1 \cdot 171 + 0 \cdot 087 * sex) * \mu$$

In Formula 1, the coefficient of sex is 1 for women and 0 for men.

### **Estimation of population attributable fraction**

PAFs were calculated for each age, sex, country, and cancer site by combining the age-, sex- and country-specific prevalence of current drinking ( $P_{CD}$ ) with the cancer RRs ( $RR$ ). Amount of alcohol consumed for current drinking ( $x$ ) was modelled with an upper integration limit of 150 g per day based on the observation that intakes greater than 150 g of alcohol per day are not sustained for a long period of time.<sup>25</sup> We modelled the contribution of different levels of alcohol consumption by splitting alcohol prevalence into three categories: moderate drinking (0.1 to 20 g per day, the equivalent of up to two alcoholic drinks per day), risky drinking (20 to 60 g per day, the equivalent of between two and six alcoholic drinks per day), and heavy drinking (>60 g per day, the equivalent more than six alcoholic drinks per day). We also split alcohol consumption by 10g per day increment from 0.1 to 10 g per day up to 140 to 150 g per day. Formula 2 was used to calculate PAFs for total current drinking and Formula 3 was used to estimate PAFs by the three categories of alcohol consumption and by 10 g increment by changing the lower and upper integration limits in the numerator appropriately, where  $y$  is the lower bound of the category and  $z$  is the upper bound.

*Formula 2*

$$PAF = \frac{\int_{0.1}^{150} P_{CD}(x)(RR_{CD}(x) - 1)dx}{\int_{0.1}^{150} P_{CD}(x)(RR_{CD}(x) - 1)dx + 1}$$

*Formula 3*

$$PAF_{category} = \frac{\int_y^z P_{CD}(x)(RR_{CD}(x) - 1)dx}{\int_{0.1}^{150} P_{CD}(x)(RR_{CD}(x) - 1)dx + 1}$$

Former alcohol consumers have an elevated risk of cancer based on their lifetime alcohol consumption.<sup>9</sup> However, the increase in cancer risk is thought to be heterogenous by country due to differences in alcohol consumption trajectories.<sup>26</sup> Accordingly, as country specific former drinker cancer risks are unknown, the elevated risk of cancer among former drinkers was not incorporated into the main analysis. As sensitivity analysis, the risk of cancer among former drinkers ( $P_{FD}$ ) was calculated using Formula 4, and the PAF from current drinking and formerly drinking was subsequently re-calculated using Formula 5.

*Formula 4*

$$PAF_{FD} = \frac{P_{FD}(RR_{FD} - 1)}{P_{FD}(RR_{FD} - 1) + \int_{0.1}^{150} P_{CD}(x)(RR_{CD}(x) - 1)dx + 1}$$

Formula 5

$$PAF_{CD+FD} = \frac{P_{FD}(RR_{FD} - 1) + \int_{0.1}^{150} P_{CD}(x)(RR_{CD}(x) - 1)dx}{P_{FD}(RR_{FD} - 1) + \int_{0.1}^{150} P_{CD}(x)(RR_{CD}(x) - 1)dx + 1}$$

To obtain estimates of alcohol-attributable cases the age-specific PAFs for each country, sex, and cancer site were applied to the cases of cancer in each five-year age group while factoring in the 10-year latency period; e.g. the PAF for laryngeal cancer in males for the 25–34 age group was applied to the number of cases of laryngeal cancer in males in the 35–39 and 40–44 age groups in each country. The PAFs for each cancer site and sex were calculated by summing the alcohol-attributable cases across all age groups then dividing by the total number of cases for all age groups combined. The total number of liver cancer cases was used as the denominator for the HCC calculations to obtain the PAF of total liver cancer, and the total number of oesophageal cancer cases was used as the denominator for the oesophageal SCC calculations.

Alcohol-attributable age-standardised incidence rates (ASIR) per 100 000 people were calculated using the age-, sex-, and country-specific number of alcohol-attributable cases in 2020, population estimates, and the Segi-Doll world standard.<sup>6,27</sup> Countries were categorised into 17 world regions based on the United Nations definitions: Australia and New Zealand, Central and Eastern Europe, Eastern Africa, Eastern Asia, Latin America and the Caribbean, Melanesia, Micronesia and Polynesia, Middle Africa, North America, Northern Africa, Northern Europe, South-Central Asia, South-Eastern Asia, Southern Africa, Southern Europe, Western Africa, Western Asia, and Western Europe. Alcohol PAFs for 10 countries with missing alcohol prevalence data (French Guiana, French Polynesia, the State of Palestine, Guadeloupe, Guam, Martinique, New Caledonia, Puerto Rico, Reunion, and South Sudan) were imputed using the average age-, sex- and cancer-specific PAFs from each pre-mentioned subregion they are located in. Subregion totals were subsequently recalculated including the imputed estimates of alcohol-attributable cases. We also grouped countries into the Human Development Index categories using the UN Development Programme human development data for 2019 (UNDP <http://www.hdr.undp.org/en/indicators/137506>).

### Estimates of uncertainty

Ninety five percent uncertainty intervals (95% UIs) were modelled using a Monte Carlo-like approach where 1 000 estimates of the drinking status, mean, and standard deviation of the alcohol consumption estimates and RRs were randomly simulated based on their respective uncertainty distributions. The methods explaining the creation of the variance and random samples of each parameter are further detailed by Gmel and colleagues.<sup>28</sup> These simulated estimates were used to create 1 000 PAF estimates using the formulae previously described. The 2.5th and 97.5th percentiles were taken from the 1 000 modelled PAF estimates to construct the 95% UIs.<sup>29</sup>

Appendix table 1. Summary of the classifications of evidence for a causal relationship between alcohol consumption and the risk of cancer by cancer site and organisation.

| Cancer site                                                                                                       | Classification                                           |                                                                     |
|-------------------------------------------------------------------------------------------------------------------|----------------------------------------------------------|---------------------------------------------------------------------|
|                                                                                                                   | International Agency for Research on Cancer <sup>5</sup> | World Cancer Research Fund (Continuous Update Project) <sup>9</sup> |
| Oral cavity                                                                                                       | Sufficient evidence                                      | Convincing                                                          |
| Pharynx                                                                                                           | Sufficient evidence                                      | Convincing                                                          |
| Oesophagus                                                                                                        | Sufficient evidence                                      | -                                                                   |
| Oesophagus - adenocarcinoma                                                                                       |                                                          | Limited - no conclusion                                             |
| Oesophagus - squamous cell carcinoma                                                                              |                                                          | Convincing                                                          |
| Colorectum                                                                                                        | Sufficient evidence                                      | Convincing                                                          |
| Liver                                                                                                             |                                                          | Convincing*                                                         |
| Liver - hepatocellular carcinoma                                                                                  | Sufficient evidence                                      |                                                                     |
| Larynx                                                                                                            | Sufficient evidence                                      | Convincing                                                          |
| Breast (female)                                                                                                   | Sufficient evidence                                      |                                                                     |
| Breast - pre-menopausal                                                                                           |                                                          | Convincing                                                          |
| Breast - post-menopausal                                                                                          |                                                          | Probable                                                            |
| Stomach                                                                                                           |                                                          | Probable**                                                          |
| Pancreas                                                                                                          | Limited evidence                                         | Limited - suggestive**                                              |
| *WCRF conclusion for colorectal cancer was based on consumption above 30 g ethanol per day                        |                                                          |                                                                     |
| **WCRF conclusions for liver, stomach and pancreatic cancers were based on consumption above 45 g ethanol per day |                                                          |                                                                     |

Appendix table 2. Relative risks and variance used for the alcohol-attributable fraction calculations

| <b>Linear dose-response per 10 g ethanol/day</b>     |                          |                                    |                     |                      |                                   |                          |                                                                                 |
|------------------------------------------------------|--------------------------|------------------------------------|---------------------|----------------------|-----------------------------------|--------------------------|---------------------------------------------------------------------------------|
|                                                      | <b>Cancer site</b>       | <b>RR</b>                          | <b>LCI</b>          | <b>UCI</b>           | <b>Variance</b>                   | <b>Notes</b>             | <b>Source</b>                                                                   |
|                                                      | Oral cavity              | 1.15                               | 1.09                | 1.22                 | 0.002874315370003^2               |                          | WCRF 2016 <sup>30</sup>                                                         |
|                                                      | Pharynx                  | 1.13                               | 1.05                | 1.21                 | 0.003618117230592^2               |                          | WCRF 2016 <sup>30</sup>                                                         |
|                                                      | Colon                    | 1.07                               | 1.05                | 1.08                 | 0.000718644820579^2               | Modelled above 20 g/day  | WCRF 2017 <sup>12</sup>                                                         |
|                                                      | Rectum                   | 1.07                               | 1.05                | 1.08                 | 0.000718644820579^2               | Modelled above 20 g/day  | WCRF 2017 <sup>12</sup>                                                         |
|                                                      | Liver - HCC              | 1.14                               | 1.04                | 1.25                 | 0.004691909136758^2               |                          | WCRF 2015 <sup>10</sup>                                                         |
|                                                      | Larynx                   | 1.09                               | 1.05                | 1.13                 | 0.001873149708031^2               |                          | WCRF 2016 <sup>30</sup>                                                         |
|                                                      | Breast - pre-menopausal  | 1.04                               | 1.01                | 1.08                 | 0.001709456894973^2               | Adjusted estimates only* | WCRF 2017 <sup>31</sup>                                                         |
|                                                      | Breast - post-menopausal | 1.08                               | 1.05                | 1.1                  | 0.001186735092727^2               | Adjusted estimates only* | WCRF 2017 <sup>31</sup>                                                         |
|                                                      | Pancreas                 | 1.17                               | 1.05                | 1.29                 | 0.003500885275581^2               | Modelled above 45 g/day  | WCRF 2012 <sup>32</sup>                                                         |
|                                                      | Stomach                  | 1.02                               | 1.00                | 1.04                 | 0.001000528396767^2               | Modelled above 45 g/day  | WCRF 2015 <sup>33</sup>                                                         |
| <b>Non-linear dose-response per 10 g ethanol/day</b> |                          |                                    |                     |                      |                                   |                          |                                                                                 |
|                                                      | <b>Cancer site</b>       | <b>RR function</b>                 |                     |                      | <b>Variance-covariance matrix</b> |                          | <b>Source</b>                                                                   |
|                                                      | Oesophagus - SCC         | $\exp(\beta_1x + \beta_2x*\ln(x))$ | $\beta_1 = 0.05593$ | $\beta_2 = -0.00789$ | 0.00006500                        | -0.00001000              | Shield 2018 (France), <sup>34</sup> originally from Bagnardi 2015 <sup>11</sup> |
|                                                      |                          |                                    |                     |                      | -0.00001000                       | 0.00000264               |                                                                                 |
| <b>Former drinkers</b>                               |                          |                                    |                     |                      |                                   |                          |                                                                                 |
|                                                      |                          | <b>Males</b>                       |                     | <b>Females</b>       |                                   |                          | <b>Source</b>                                                                   |
|                                                      | <b>Cancer site</b>       | <b>RR</b>                          | <b>Variance</b>     | <b>RR</b>            | <b>Variance</b>                   |                          |                                                                                 |
|                                                      | Oral cavity              | 1.2                                | 0.330343005747873^2 | 1.2                  | 0.330343005747873^2               |                          | Shield 2020, <sup>2</sup> originally from Marron et al., 2010 <sup>14</sup>     |
|                                                      | Pharynx                  | 1.2                                | 0.330343005747873^2 | 1.2                  | 0.330343005747873^2               |                          | Shield 2020, <sup>2</sup> originally from Marron et al., 2010 <sup>14</sup>     |
|                                                      | Larynx                   | 1.18                               | 0.288991189^2       | 1.18                 | 0.288991189^2                     |                          | Shield 2020, <sup>2</sup> originally from Marron et al., 2010 <sup>14</sup>     |
|                                                      | Oesophagus               | 1.16                               | 0.243480229040442^2 | 1.16                 | 0.243480229040442^2               |                          | Shield 2020, <sup>2</sup> originally from Marron et al., 2010 <sup>14</sup>     |
|                                                      | Colon                    | 2.19                               | 0.0465106^2         | 1.05                 | 0.145968002587317^2               |                          | Shield 2020, <sup>2</sup> originally from Schütze et al., 2011 <sup>13</sup>    |
|                                                      | Rectum                   | 2.19                               | 0.0465106^2         | 1.05                 | 0.145968002587317^2               |                          | Shield 2020, <sup>2</sup> originally from Schütze et al., 2011 <sup>13</sup>    |
|                                                      | Liver                    | 2.23                               | 0.259097757^2       | 2.68                 | 0.272560609^2                     |                          | WCRF 2015 <sup>10</sup>                                                         |



|                                                                      |          |      |                        |      |                        |  |                                                                 |
|----------------------------------------------------------------------|----------|------|------------------------|------|------------------------|--|-----------------------------------------------------------------|
|                                                                      | Breast   | -    | -                      | 1    | 0                      |  | Shield 2020, originally from Schütze et al., 2011 <sup>13</sup> |
|                                                                      | Pancreas | 1.21 | 0.0465106 <sup>2</sup> | 1.44 | 0.0585138 <sup>2</sup> |  | Corrao 2004 <sup>15</sup>                                       |
|                                                                      | Stomach  | 1.21 | 0.0465106 <sup>2</sup> | 1.44 | 0.0585138 <sup>2</sup> |  | Corrao 2004 <sup>15</sup>                                       |
| *Only estimates which adjusted for age, BMI and reproductive factors |          |      |                        |      |                        |  |                                                                 |

Appendix table 3. Global number of alcohol-attributable cancer cases, population attributable fraction, and age-standardised incidence rate of alcohol-attributable cases in 2020, by world region, Human Development Index, and sex

| World Region                           | Males                           |                         |                        | Females                      |                        |                      | Total                           |                        |                        |
|----------------------------------------|---------------------------------|-------------------------|------------------------|------------------------------|------------------------|----------------------|---------------------------------|------------------------|------------------------|
|                                        | Alcohol-attributable cases      | PAF                     | ASIR per 100,000       | Alcohol-attributable cases   | PAF                    | ASIR per 100,000     | Alcohol-attributable cases      | PAF                    | ASIR per 100,000       |
| <b>Africa</b>                          |                                 |                         |                        |                              |                        |                      |                                 |                        |                        |
| Eastern Africa                         | 6 000<br>(4 200 to 7 900)       | 4.9%<br>(3.4% to 6.4%)  | 5.9<br>(4.0 to 7.8)    | 2 300<br>(1 700 to 3 100)    | 1.1%<br>(0.8% to 1.6%) | 1.9<br>(1.3 to 2.7)  | 8 300<br>(5 800 to 11 100)      | 2.6%<br>(1.8% to 3.4%) | 3.8<br>(2.6 to 5.1)    |
| Middle Africa                          | 1 900<br>(1 200 to 2 600)       | 4.3%<br>(2.8% to 5.8%)  | 4.6<br>(3.0 to 6.3)    | 740<br>(510 to 1 000)        | 1.2%<br>(0.8% to 1.7%) | 1.6<br>(1.0 to 2.3)  | 2 600<br>(1 700 to 3 700)       | 2.5%<br>(1.7% to 3.5%) | 3.0<br>(1.9 to 4.2)    |
| Northern Africa                        | 820<br>(350 to 9 500)           | 0.6%<br>(0.2% to 6.5%)  | 0.8<br>(0.3 to 12.8)   | 180<br>(80 to 370)           | 0.1%<br>(0.0% to 0.2%) | 0.2<br>(0.1 to 0.4)  | 990<br>(420 to 9 800)           | 0.3%<br>(0.1% to 3.3%) | 0.5<br>(0.2 to 6.4)    |
| Southern Africa                        | 2 800<br>(2 100 to 3 500)       | 5.7%<br>(4.2% to 7.0%)  | 12.6<br>(9.1 to 15.7)  | 1 400<br>(830 to 1 900)      | 2.3%<br>(1.4% to 3.3%) | 4.4<br>(2.5 to 6.6)  | 4 200<br>(2 900 to 5 400)       | 3.9%<br>(2.7% to 5.0%) | 7.8<br>(5.3 to 10.3)   |
| Western Africa                         | 4 400<br>(2 500 to 6 300)       | 4.5%<br>(2.6% to 6.5%)  | 4.6<br>(2.7 to 6.8)    | 2 700<br>(1 900 to 3 700)    | 1.8%<br>(1.3% to 2.6%) | 2.5<br>(1.6 to 3.7)  | 7 000<br>(4 300 to 10 100)      | 2.9%<br>(1.8% to 4.2%) | 3.5<br>(2.1 to 5.2)    |
| <b>Asia</b>                            |                                 |                         |                        |                              |                        |                      |                                 |                        |                        |
| Eastern Asia                           | 275 900<br>(172 600 to 378 400) | 8.6%<br>(5.4% to 11.8%) | 21.5<br>(13.4 to 29.6) | 56 300<br>(36 200 to 81 900) | 2.1%<br>(1.4% to 3.1%) | 4.3<br>(2.5 to 6.6)  | 332 100<br>(208 800 to 460 200) | 5.7%<br>(3.6% to 7.9%) | 12.7<br>(7.9 to 17.9)  |
| South-Central Asia                     | 59 200<br>(33 200 to 114 800)   | 6.2%<br>(3.5% to 12.0%) | 6.7<br>(3.7 to 13.3)   | 8 900<br>(4 800 to 19 000)   | 0.9%<br>(0.5% to 1.9%) | 1.0<br>(0.5 to 2.2)  | 68 100<br>(37 900 to 133 800)   | 3.5%<br>(2.0% to 6.9%) | 3.8<br>(2.1 to 7.7)    |
| South-Eastern Asia                     | 23 000<br>(14 100 to 33 400)    | 4.4%<br>(2.7% to 6.4%)  | 7.4<br>(4.5 to 10.8)   | 4 700<br>(3 300 to 6 400)    | 0.8%<br>(0.6% to 1.1%) | 1.3<br>(0.9 to 1.9)  | 27 700<br>(17 500 to 39 700)    | 2.6%<br>(1.6% to 3.7%) | 4.1<br>(2.6 to 6.0)    |
| Western Asia                           | 2 300<br>(1 500 to 3 900)       | 1.0%<br>(0.7% to 1.7%)  | 2.1<br>(1.4 to 3.8)    | 750<br>(480 to 1 300)        | 0.4%<br>(0.2% to 0.6%) | 0.6<br>(0.4 to 1.2)  | 3 000<br>(2 000 to 5 200)       | 0.7%<br>(0.5% to 1.2%) | 1.3<br>(0.8 to 2.4)    |
| <b>Europe</b>                          |                                 |                         |                        |                              |                        |                      |                                 |                        |                        |
| Central and Eastern Europe             | 49 900<br>(41 100 to 57 300)    | 7.8%<br>(6.5% to 9.0%)  | 23.1<br>(19.0 to 26.6) | 21 500<br>(16 700 to 26 900) | 3.4%<br>(2.6% to 4.3%) | 7.4<br>(5.1 to 10.0) | 71 400<br>(57 800 to 84 200)    | 5.6%<br>(4.6% to 6.6%) | 14.0<br>(10.9 to 16.9) |
| Northern Europe                        | 15 600<br>(12 600 to 18 300)    | 4.7%<br>(3.8% to 5.5%)  | 15.6<br>(12.4 to 18.3) | 9 200<br>(6 600 to 12 100)   | 3.0%<br>(2.2% to 4.0%) | 9.1<br>(5.9 to 12.8) | 24 800<br>(19 200 to 30 300)    | 3.9%<br>(3.0% to 4.8%) | 12.2<br>(9.0 to 15.3)  |
| Southern Europe                        | 23 100<br>(18 300 to 27 400)    | 4.8%<br>(3.8% to 5.7%)  | 14.9<br>(11.7 to 17.7) | 9 300<br>(6 900 to 12 000)   | 2.3%<br>(1.7% to 3.0%) | 5.9<br>(3.7 to 8.2)  | 32 400<br>(25 200 to 39 400)    | 3.6%<br>(2.8% to 4.4%) | 10.1<br>(7.5 to 12.6)  |
| Western Europe                         | 34 400<br>(27 500 to 40 300)    | 5.1%<br>(4.1% to 6.0%)  | 17.3<br>(13.8 to 20.4) | 18 400<br>(13 800 to 23 200) | 3.2%<br>(2.4% to 4.1%) | 9.4<br>(6.2 to 12.8) | 52 800<br>(41 300 to 63 500)    | 4.2%<br>(3.3% to 5.1%) | 13.1<br>(9.8 to 16.3)  |
| <b>Latin America and the Caribbean</b> |                                 |                         |                        |                              |                        |                      |                                 |                        |                        |
| Latin America and the Caribbean        | 26 800<br>(20 600 to 32 300)    | 3.9%<br>(3.0% to 4.7%)  | 8.0<br>(6.0 to 9.7)    | 12 600<br>(9 100 to 17 100)  | 1.8%<br>(1.3% to 2.4%) | 3.3<br>(2.1 to 4.7)  | 39 300<br>(29 600 to 49 400)    | 2.8%<br>(2.1% to 3.5%) | 5.4<br>(3.9 to 7.0)    |
| <b>North America</b>                   |                                 |                         |                        |                              |                        |                      |                                 |                        |                        |
| North America                          | 38 500                          | 3.8%                    | 12.7                   | 21 200                       | 2.2%                   | 6.7                  | 59 600                          | 3.0%                   | 9.5                    |

|                                                                                                                                                                                                                                   |                      |                 |                |                      |                |               |                      |                |               |
|-----------------------------------------------------------------------------------------------------------------------------------------------------------------------------------------------------------------------------------|----------------------|-----------------|----------------|----------------------|----------------|---------------|----------------------|----------------|---------------|
|                                                                                                                                                                                                                                   | (27 000 to 48 400)   | (2.7% to 4.8%)  | (8.8 to 16.0)  | (13 500 to 29 400)   | (1.4% to 3.0%) | (3.8 to 10.1) | (40 600 to 77 800)   | (2.1% to 4.0%) | (6.2 to 12.9) |
| <b>Oceania</b>                                                                                                                                                                                                                    |                      |                 |                |                      |                |               |                      |                |               |
| Australia and New Zealand                                                                                                                                                                                                         | 4 200                | 4.8%            | 17.0           | 2 600                | 3.3%           | 10.2          | 6 800                | 4.1%           | 13.5          |
|                                                                                                                                                                                                                                   | (3 200 to 5 100)     | (3.7% to 5.8%)  | (12.7 to 20.7) | (1 700 to 3 500)     | (2.2% to 4.4%) | (6.3 to 15.2) | (5 000 to 8 600)     | (3.0% to 5.1%) | (9.4 to 17.8) |
| Melanesia, Micronesia and Polynesia                                                                                                                                                                                               | 160                  | 2.1%            | 4.2            | 30                   | 0.4%           | 0.8           | 190                  | 1.2%           | 2.4           |
|                                                                                                                                                                                                                                   | (30 to 310)          | (0.4% to 4.1%)  | (0.8 to 8.1)   | (10 to 60)           | (0.1% to 0.7%) | (0.2 to 1.4)  | (40 to 370)          | (0.2% to 2.2%) | (0.5 to 4.5)  |
| <b>HDI</b>                                                                                                                                                                                                                        |                      |                 |                |                      |                |               |                      |                |               |
| Very high HDI                                                                                                                                                                                                                     | 203 100              | 4.9%            | 15.4           | 92 600               | 2.5%           | 6.6           | 295 700              | 3.8%           | 10.7          |
|                                                                                                                                                                                                                                   | (161 700 to 236 700) | (3.9% to 5.7%)  | (12.3 to 18.0) | (71 600 to 114 400)  | (1.9% to 3.1%) | (4.5 to 8.9)  | (233 300 to 351 100) | (3.0% to 4.5%) | (8.1 to 13.0) |
| High HDI                                                                                                                                                                                                                          | 291 500              | 7.6%            | 16.1           | 65 100               | 1.9%           | 3.4           | 356 500              | 4.9%           | 9.5           |
|                                                                                                                                                                                                                                   | (188 800 to 398 200) | (4.9% to 10.4%) | (10.4 to 22.0) | (44 100 to 91 100)   | (1.3% to 2.6%) | (2.1 to 5.0)  | (232 900 to 489 300) | (3.2% to 6.7%) | (6.1 to 13.2) |
| Medium HDI                                                                                                                                                                                                                        | 63 000               | 6.2%            | 6.8            | 9 900                | 0.9%           | 1.0           | 72 900               | 3.5%           | 3.9           |
|                                                                                                                                                                                                                                   | (36 700 to 118 900)  | (3.6% to 11.8%) | (3.8 to 13.1)  | (5 600 to 19 700)    | (0.5% to 1.8%) | (0.6 to 2.2)  | (42 300 to 138 700)  | (2.0% to 6.6%) | (2.2 to 7.6)  |
| Low HDI                                                                                                                                                                                                                           | 9 400                | 4.0%            | 4.3            | 4 600                | 1.3%           | 1.8           | 14 000               | 2.4%           | 3.0           |
|                                                                                                                                                                                                                                   | (6 500 to 13 600)    | (2.8% to 5.7%)  | (3.0 to 6.2)   | (3 500 to 6 300)     | (1.0% to 1.8%) | (1.3 to 2.7)  | (10 000 to 19 800)   | (1.7% to 3.3%) | (2.1 to 4.3)  |
| Missing                                                                                                                                                                                                                           | 1 800                | 4.1%            | 7.7            | 380                  | 0.8%           | 1.4           | 2 100                | 2.4%           | 4.2           |
|                                                                                                                                                                                                                                   | (1 000 to 2 800)     | (2.4% to 6.5%)  | (4.5 to 12.2)  | (260 to 600)         | (0.5% to 1.3%) | (0.8 to 2.3)  | (1 300 to 3 400)     | (1.4% to 3.8%) | (2.4 to 6.7)  |
| <b>World</b>                                                                                                                                                                                                                      | 568 700              | 6.1%            | 13.4           | 172 600              | 2.0%           | 3.7           | 741 300              | 4.1%           | 8.4           |
|                                                                                                                                                                                                                                   | (422 500 to 731 100) | (4.6% to 7.9%)  | (10.0 to 17.4) | (135 900 to 220 100) | (1.6% to 2.5%) | (2.7 to 5.0)  | (558 500 to 951 200) | (3.1% to 5.3%) | (6.2 to 10.9) |
| Numbers in parentheses are 95% Uncertainty Intervals. Cases may not sum due to rounding. PAF, Population-attributable Fraction; ASIR, Age-standardised incidence rate of alcohol-attributable cases; HDI, Human Development Index |                      |                 |                |                      |                |               |                      |                |               |
| Missing HDI assigned to the following countries: French Guiana, French Polynesia, Guadeloupe, Guam, Korea (the Democratic People's Republic of), Martinique, New Caledonia, Puerto Rico, Reunion, and Somalia.                    |                      |                 |                |                      |                |               |                      |                |               |

Appendix table 4. Number of alcohol-attributable cancer cases, population attributable fraction, and age-standardised incidence rate of alcohol-attributable cases in 2020, by country and sex. Number of cases suppressed if less than five.

| Continent | Region         | Human Development Index | Country            | Males                      |                         |                       | Females                    |                        |                     | Total                      |                         |                      |
|-----------|----------------|-------------------------|--------------------|----------------------------|-------------------------|-----------------------|----------------------------|------------------------|---------------------|----------------------------|-------------------------|----------------------|
|           |                |                         |                    | Alcohol-attributable cases | PAF                     | ASIR per 100,000      | Alcohol-attributable cases | PAF                    | ASIR per 100,000    | Alcohol-attributable cases | PAF                     | ASIR per 100,000     |
| Africa    | Eastern Africa | Low HDI                 | Burundi            | 220<br>(130 to 300)        | 6.8%<br>(4.2% to 9.2%)  | 8.3<br>(5.1 to 11.4)  | 70<br>(40 to 100)          | 1.4%<br>(0.8% to 2.2%) | 2.3<br>(1.2 to 3.6) | 280<br>(170 to 400)        | 3.6%<br>(2.2% to 5.1%)  | 5.2<br>(3.1 to 7.3)  |
| Africa    | Eastern Africa | Low HDI                 | Comoros            | <5<br>(<5 to 40)           | 0.6%<br>(0.1% to 19.8%) | 0.6<br>(0.1 to 18.9)  | <5<br>(<5 to 20)           | 0.0%<br>(0.0% to 4.8%) | 0.1<br>(0.0 to 7.1) | <5<br>(<5 to 60)           | 0.3%<br>(0.0% to 10.3%) | 0.3<br>(0.0 to 12.7) |
| Africa    | Eastern Africa | Low HDI                 | Djibouti           | <5<br>(<5 to 20)           | 1.0%<br>(0.0% to 5.5%)  | 0.8<br>(0.0 to 2.3)   | <5<br>(<5 to <5)           | 0.1%<br>(0.0% to 0.4%) | 0.2<br>(0.0 to 0.5) | <5<br>(<5 to 20)           | 0.5%<br>(0.0% to 2.3%)  | 0.5<br>(0.0 to 1.3)  |
| Africa    | Eastern Africa | Low HDI                 | Eritrea            | 10<br>(<5 to 20)           | 1.1%<br>(0.0% to 2.6%)  | 0.7<br>(0.0 to 1.8)   | <5<br>(<5 to 9)            | 0.3%<br>(0.0% to 0.6%) | 0.3<br>(0.0 to 0.6) | 10<br>(<5 to 30)           | 0.6%<br>(0.0% to 1.3%)  | 0.5<br>(0.0 to 1.1)  |
| Africa    | Eastern Africa | Low HDI                 | Ethiopia           | 700<br>(200 to 1 100)      | 2.7%<br>(0.8% to 4.2%)  | 2.5<br>(0.7 to 4.0)   | 360<br>(110 to 650)        | 0.7%<br>(0.2% to 1.3%) | 1.1<br>(0.3 to 2.1) | 1 100<br>(310 to 1 700)    | 1.4%<br>(0.4% to 2.3%)  | 1.8<br>(0.5 to 3.0)  |
| Africa    | Eastern Africa | Missing                 | France, La Réunion | 70<br>(50 to 90)           | 4.0%<br>(3.0% to 5.2%)  | 11.1<br>(8.3 to 14.6) | 10<br>(10 to 20)           | 1.1%<br>(0.8% to 1.4%) | 2.1<br>(1.3 to 2.9) | 80<br>(60 to 110)          | 2.8%<br>(2.0% to 3.6%)  | 6.4<br>(4.6 to 8.4)  |
| Africa    | Eastern Africa | Medium HDI              | Kenya              | 820<br>(390 to 1 200)      | 5.3%<br>(2.6% to 7.7%)  | 7.6<br>(3.6 to 11.1)  | 360<br>(150 to 610)        | 1.4%<br>(0.6% to 2.3%) | 2.7<br>(1.1 to 4.8) | 1 200<br>(550 to 1 800)    | 2.8%<br>(1.3% to 4.3%)  | 4.9<br>(2.2 to 7.6)  |
| Africa    | Eastern Africa | Low HDI                 | Madagascar         | 230<br>(40 to 430)         | 2.9%<br>(0.5% to 5.4%)  | 3.5<br>(0.6 to 6.6)   | 50<br>(9 to 100)           | 0.4%<br>(0.1% to 0.8%) | 0.6<br>(0.1 to 1.3) | 280<br>(50 to 520)         | 1.4%<br>(0.2% to 2.6%)  | 2.0<br>(0.3 to 3.8)  |
| Africa    | Eastern Africa | Low HDI                 | Malawi             | 350<br>(130 to 550)        | 5.3%<br>(2.0% to 8.4%)  | 8.4<br>(3.2 to 13.4)  | 100<br>(30 to 170)         | 0.9%<br>(0.3% to 1.6%) | 1.8<br>(0.7 to 3.3) | 440<br>(170 to 730)        | 2.5%<br>(0.9% to 4.1%)  | 4.8<br>(1.8 to 7.8)  |
| Africa    | Eastern Africa | High HDI                | Mauritius          | 40<br>(20 to 60)           | 3.0%<br>(1.4% to 4.6%)  | 4.4<br>(2.0 to 7.0)   | 20<br>(7 to 30)            | 1.0%<br>(0.5% to 1.7%) | 1.7<br>(0.7 to 3.0) | 60<br>(30 to 90)           | 1.9%<br>(0.9% to 3.0%)  | 2.9<br>(1.3 to 4.8)  |

|        |                |            |                               |                |                 |                |              |                |              |                  |                |               |
|--------|----------------|------------|-------------------------------|----------------|-----------------|----------------|--------------|----------------|--------------|------------------|----------------|---------------|
| Africa | Eastern Africa | Low HDI    | Mozambique                    | 200            | 2.1%            | 2.9            | 70           | 0.4%           | 0.7          | 270              | 1.1%           | 1.7           |
|        |                |            |                               | (30 to 410)    | (0.3% to 4.2%)  | (0.5 to 5.8)   | (10 to 130)  | (0.1% to 0.9%) | (0.1 to 1.5) | (50 to 540)      | (0.2% to 2.2%) | (0.3 to 3.4)  |
| Africa | Eastern Africa | Low HDI    | Rwanda                        | 240            | 6.5%            | 7.7            | 110          | 2.2%           | 2.9          | 350              | 4.0%           | 5.1           |
|        |                |            |                               | (160 to 310)   | (4.4% to 8.6%)  | (5.1 to 10.3)  | (70 to 160)  | (1.4% to 3.1%) | (1.7 to 4.4) | (230 to 470)     | (2.6% to 5.4%) | (3.3 to 7.1)  |
| Africa | Eastern Africa | Missing    | Somalia                       | 20             | 0.6%            | 0.6            | 9            | 0.1%           | 0.2          | 30               | 0.3%           | 0.4           |
|        |                |            |                               | (<5 to 330)    | (0.1% to 9.1%)  | (0.1 to 10.0)  | (<5 to 180)  | (0.0% to 2.9%) | (0.0 to 5.4) | (<5 to 510)      | (0.0% to 5.2%) | (0.1 to 7.7)  |
| Africa | Eastern Africa | Low HDI    | South Sudan                   | 150            | 5.7%            | 4.4            | 50           | 1.4%           | 1.3          | 200              | 3.2%           | 2.8           |
|        |                |            |                               | (100 to 200)   | (3.8% to 7.4%)  | (2.9 to 5.7)   | (40 to 70)   | (1.0% to 1.9%) | (0.9 to 1.8) | (130 to 260)     | (2.2% to 4.2%) | (1.8 to 3.7)  |
| Africa | Eastern Africa | Low HDI    | Tanzania, United Republic of  | 1 200          | 8.2%            | 8.6            | 440          | 1.8%           | 2.8          | 1 700            | 4.2%           | 5.5           |
|        |                |            |                               | (770 to 1 600) | (5.2% to 10.7%) | (5.4 to 11.3)  | (260 to 640) | (1.1% to 2.6%) | (1.6 to 4.3) | (1 000 to 2 200) | (2.6% to 5.7%) | (3.4 to 7.6)  |
| Africa | Eastern Africa | Low HDI    | Uganda                        | 1 400          | 9.7%            | 17.7           | 540          | 2.8%           | 5.7          | 1 900            | 5.7%           | 11.1          |
|        |                |            |                               | (940 to 1 800) | (6.6% to 12.3%) | (11.9 to 22.4) | (360 to 770) | (1.9% to 4.0%) | (3.7 to 8.3) | (1 300 to 2 500) | (3.9% to 7.5%) | (7.4 to 14.6) |
| Africa | Eastern Africa | Medium HDI | Zambia                        | 180            | 3.0%            | 5.3            | 50           | 0.6%           | 1.2          | 230              | 1.7%           | 3.0           |
|        |                |            |                               | (100 to 260)   | (1.6% to 4.4%)  | (2.9 to 7.6)   | (20 to 80)   | (0.3% to 1.1%) | (0.5 to 2.0) | (120 to 340)     | (0.9% to 2.5%) | (1.6 to 4.5)  |
| Africa | Eastern Africa | Medium HDI | Zimbabwe                      | 200            | 3.6%            | 6.2            | 70           | 0.7%           | 1.5          | 270              | 1.7%           | 3.5           |
|        |                |            |                               | (100 to 300)   | (1.7% to 5.4%)  | (2.9 to 9.4)   | (30 to 120)  | (0.3% to 1.2%) | (0.6 to 2.8) | (120 to 420)     | (0.8% to 2.7%) | (1.6 to 5.6)  |
| Africa | Middle Africa  | Medium HDI | Angola                        | 540            | 6.5%            | 8.4            | 230          | 2.0%           | 2.8          | 770              | 3.9%           | 5.4           |
|        |                |            |                               | (380 to 670)   | (4.6% to 8.1%)  | (5.8 to 10.5)  | (140 to 320) | (1.2% to 2.8%) | (1.6 to 4.2) | (520 to 990)     | (2.7% to 5.1%) | (3.5 to 7.1)  |
| Africa | Middle Africa  | Medium HDI | Cameroon                      | 470            | 5.6%            | 6.9            | 220          | 1.8%           | 2.9          | 690              | 3.4%           | 4.8           |
|        |                |            |                               | (280 to 660)   | (3.4% to 7.9%)  | (4.2 to 9.7)   | (120 to 360) | (1.0% to 3.0%) | (1.3 to 4.8) | (400 to 1 000)   | (1.9% to 5.0%) | (2.7 to 7.1)  |
| Africa | Middle Africa  | Low HDI    | Central African Republic      | 30             | 3.3%            | 2.7            | 10           | 0.9%           | 1.0          | 50               | 1.9%           | 1.8           |
|        |                |            |                               | (10 to 60)     | (1.1% to 5.6%)  | (0.9 to 4.6)   | (5 to 30)    | (0.3% to 1.7%) | (0.3 to 1.9) | (20 to 90)       | (0.6% to 3.2%) | (0.6 to 3.2)  |
| Africa | Middle Africa  | Low HDI    | Chad                          | 140            | 4.2%            | 4.3            | 50           | 1.0%           | 1.4          | 190              | 2.3%           | 2.8           |
|        |                |            |                               | (60 to 210)    | (1.9% to 6.4%)  | (1.9 to 6.6)   | (20 to 100)  | (0.4% to 1.9%) | (0.5 to 2.6) | (80 to 310)      | (1.0% to 3.7%) | (1.2 to 4.5)  |
| Africa | Middle Africa  | Low HDI    | Congo, Democratic Republic of | 570            | 2.7%            | 2.8            | 170          | 0.6%           | 0.7          | 740              | 1.5%           | 1.7           |

|        |                 |            |                       |                |                 |               |             |                |              |                |                |               |
|--------|-----------------|------------|-----------------------|----------------|-----------------|---------------|-------------|----------------|--------------|----------------|----------------|---------------|
|        |                 |            |                       | (200 to 1 000) | (0.9% to 4.8%)  | (1.0 to 5.0)  | (60 to 300) | (0.2% to 1.1%) | (0.3 to 1.3) | (260 to 1 300) | (0.5% to 2.8%) | (0.6 to 3.1)  |
| Africa | Middle Africa   | Medium HDI | Congo, Republic of    | 40             | 3.6%            | 2.5           | 20          | 1.5%           | 1.2          | 60             | 2.4%           | 1.9           |
|        |                 |            |                       | (20 to 60)     | (1.7% to 5.8%)  | (1.2 to 4.0)  | (10 to 30)  | (0.8% to 2.4%) | (0.6 to 2.1) | (30 to 100)    | (1.2% to 3.9%) | (0.9 to 3.0)  |
| Africa | Middle Africa   | Medium HDI | Equatorial Guinea     | 30             | 7.8%            | 7.5           | 10          | 2.3%           | 3.3          | 40             | 4.8%           | 5.6           |
|        |                 |            |                       | (20 to 40)     | (4.7% to 10.6%) | (4.7 to 10.2) | (7 to 20)   | (1.3% to 3.6%) | (1.6 to 5.3) | (30 to 60)     | (2.8% to 6.7%) | (3.3 to 7.9)  |
| Africa | Middle Africa   | High HDI   | Gabon                 | 70             | 9.9%            | 9.6           | 30          | 2.6%           | 3.7          | 100            | 5.6%           | 6.7           |
|        |                 |            |                       | (50 to 90)     | (6.6% to 12.6%) | (6.4 to 12.5) | (20 to 40)  | (1.6% to 3.8%) | (2.0 to 5.7) | (60 to 130)    | (3.6% to 7.4%) | (4.3 to 9.1)  |
| Africa | Middle Africa   | Medium HDI | Sao Tome and Principe | <5             | 5.1%            | 9.8           | <5          | 2.2%           | 3.0          | 6              | 3.7%           | 6.1           |
|        |                 |            |                       | (<5 to 6)      | (2.5% to 7.6%)  | (4.6 to 14.8) | (<5 to <5)  | (1.3% to 3.1%) | (1.7 to 4.7) | (<5 to 8)      | (2.0% to 5.5%) | (2.9 to 9.2)  |
| Africa | Northern Africa | High HDI   | Algeria               | 80             | 0.3%            | 0.4           | 30          | 0.1%           | 0.1          | 110            | 0.2%           | 0.3           |
|        |                 |            |                       | (<5 to 350)    | (0.0% to 1.3%)  | (0.0 to 1.1)  | (<5 to 90)  | (0.0% to 0.3%) | (0.0 to 0.5) | (<5 to 440)    | (0.0% to 0.8%) | (0.0 to 0.8)  |
| Africa | Northern Africa | High HDI   | Egypt                 | 470            | 0.7%            | 1.2           | 60          | 0.1%           | 0.1          | 530            | 0.4%           | 0.7           |
|        |                 |            |                       | (<5 to 8 900)  | (0.0% to 13.6%) | (0.0 to 28.9) | (<5 to 220) | (0.0% to 0.3%) | (0.0 to 0.5) | (<5 to 9 100)  | (0.0% to 6.9%) | (0.0 to 14.1) |
| Africa | Northern Africa | High HDI   | Libya                 | <5             | 0.0%            | 0.0           | <5          | 0.0%           | 0.0          | <5             | 0.0%           | 0.0           |
|        |                 |            |                       | (<5 to 270)    | (0.0% to 7.3%)  | (0.0 to 12.1) | (<5 to <5)  | (0.0% to 0.1%) | (0.0 to 0.1) | (<5 to 270)    | (0.0% to 3.6%) | (0.0 to 5.7)  |
| Africa | Northern Africa | Medium HDI | Morocco               | 140            | 0.5%            | 0.8           | 50          | 0.2%           | 0.3          | 200            | 0.3%           | 0.5           |
|        |                 |            |                       | (10 to 1 800)  | (0.0% to 6.1%)  | (0.0 to 11.0) | (<5 to 120) | (0.0% to 0.4%) | (0.0 to 0.7) | (10 to 1 900)  | (0.0% to 3.2%) | (0.0 to 5.6)  |
| Africa | Northern Africa | Low HDI    | Sudan                 | 60             | 0.5%            | 0.5           | 20          | 0.1%           | 0.1          | 70             | 0.3%           | 0.3           |
|        |                 |            |                       | (<5 to 1 000)  | (0.0% to 9.6%)  | (0.0 to 9.8)  | (<5 to 60)  | (0.0% to 0.4%) | (0.0 to 0.5) | (<5 to 1 100)  | (0.0% to 4.0%) | (0.0 to 4.9)  |
| Africa | Northern Africa | High HDI   | Tunisia               | 70             | 0.7%            | 1.1           | 20          | 0.2%           | 0.3          | 90             | 0.5%           | 0.7           |
|        |                 |            |                       | (20 to 110)    | (0.2% to 1.1%)  | (0.2 to 1.7)  | (<5 to 40)  | (0.0% to 0.5%) | (0.0 to 0.6) | (20 to 150)    | (0.1% to 0.8%) | (0.1 to 1.2)  |
| Africa | Southern Africa | High HDI   | Botswana              | 70             | 8.5%            | 10.3          | 20          | 1.4%           | 1.8          | 80             | 4.4%           | 5.4           |
|        |                 |            |                       | (50 to 90)     | (5.8% to 11.0%) | (6.8 to 13.7) | (10 to 20)  | (0.8% to 2.2%) | (1.0 to 2.8) | (60 to 110)    | (2.9% to 5.8%) | (3.5 to 7.4)  |
| Africa | Southern Africa | Medium HDI | Eswatini              | 10             | 3.5%            | 3.8           | <5          | 0.7%           | 1.0          | 20             | 1.7%           | 2.1           |
|        |                 |            |                       | (7 to 20)      | (2.2% to 5.0%)  | (2.2 to 5.4)  | (<5 to 7)   | (0.4% to 1.1%) | (0.5 to 1.6) | (10 to 20)     | (1.0% to 2.4%) | (1.2 to 3.1)  |
| Africa | Southern Africa | Low HDI    | Lesotho               | 40             | 6.8%            | 8.1           | 20          | 1.4%           | 2.1          | 60             | 3.3%           | 4.4           |

|        |                 |            |               |                  |                 |                |                |                |              |                  |                |               |
|--------|-----------------|------------|---------------|------------------|-----------------|----------------|----------------|----------------|--------------|------------------|----------------|---------------|
|        |                 |            |               | (30 to 60)       | (4.3% to 9.1%)  | (5.1 to 10.9)  | (9 to 30)      | (0.8% to 2.4%) | (1.1 to 3.5) | (40 to 90)       | (2.0% to 4.8%) | (2.7 to 6.4)  |
| Africa | Southern Africa | Medium HDI | Namibia       | 70               | 5.2%            | 10.7           | 40             | 2.2%           | 4.5          | 110              | 3.5%           | 7.1           |
|        |                 |            |               | (50 to 90)       | (4.0% to 6.5%)  | (7.9 to 13.4)  | (30 to 60)     | (1.4% to 3.2%) | (2.5 to 6.7) | (80 to 140)      | (2.5% to 4.6%) | (4.8 to 9.5)  |
| Africa | Southern Africa | High HDI   | South Africa  | 2 600            | 5.7%            | 13.0           | 1 300          | 2.4%           | 4.6          | 3 900            | 3.9%           | 8.1           |
|        |                 |            |               | (1 900 to 3 200) | (4.2% to 7.0%)  | (9.4 to 16.2)  | (760 to 1 800) | (1.4% to 3.4%) | (2.5 to 6.9) | (2 700 to 5 100) | (2.7% to 5.0%) | (5.4 to 10.7) |
| Africa | Western Africa  | Low HDI    | Benin         | 70               | 2.3%            | 2.5            | 20             | 0.6%           | 0.6          | 90               | 1.4%           | 1.5           |
|        |                 |            |               | (20 to 130)      | (0.6% to 4.4%)  | (0.6 to 4.8)   | (6 to 40)      | (0.2% to 1.2%) | (0.2 to 1.2) | (20 to 180)      | (0.4% to 2.7%) | (0.4 to 2.8)  |
| Africa | Western Africa  | Low HDI    | Burkina Faso  | 310              | 7.3%            | 6.3            | 100            | 1.4%           | 1.9          | 420              | 3.5%           | 3.9           |
|        |                 |            |               | (160 to 480)     | (3.8% to 11.3%) | (3.2 to 9.8)   | (60 to 160)    | (0.8% to 2.2%) | (1.0 to 3.2) | (220 to 640)     | (1.9% to 5.5%) | (2.0 to 6.2)  |
| Africa | Western Africa  | Medium HDI | Cabo Verde    | 40               | 10.3%           | 22.5           | 6              | 1.4%           | 2.7          | 50               | 5.8%           | 11.6          |
|        |                 |            |               | (20 to 50)       | (6.2% to 13.4%) | (13.4 to 29.6) | (<5 to 9)      | (0.7% to 2.2%) | (1.3 to 4.5) | (30 to 60)       | (3.4% to 7.7%) | (6.7 to 15.8) |
| Africa | Western Africa  | Low HDI    | Côte d'Ivoire | 340              | 4.6%            | 4.8            | 170            | 1.7%           | 2.6          | 500              | 3.0%           | 3.7           |
|        |                 |            |               | (170 to 510)     | (2.3% to 7.0%)  | (2.4 to 7.2)   | (90 to 260)    | (0.9% to 2.7%) | (1.3 to 4.1) | (260 to 770)     | (1.5% to 4.5%) | (1.9 to 5.8)  |
| Africa | Western Africa  | Medium HDI | Ghana         | 730              | 7.5%            | 8.1            | 210            | 1.5%           | 2.1          | 940              | 4.0%           | 4.9           |
|        |                 |            |               | (230 to 1 300)   | (2.4% to 13.2%) | (2.8 to 14.2)  | (100 to 370)   | (0.7% to 2.6%) | (0.9 to 3.8) | (330 to 1 700)   | (1.4% to 7.0%) | (1.8 to 8.7)  |
| Africa | Western Africa  | Low HDI    | Guinea        | 30               | 1.1%            | 0.8            | 5              | 0.1%           | 0.1          | 30               | 0.5%           | 0.5           |
|        |                 |            |               | (<5 to 110)      | (0.0% to 4.2%)  | (0.0 to 3.3)   | (<5 to 20)     | (0.0% to 0.3%) | (0.0 to 0.4) | (<5 to 130)      | (0.0% to 1.7%) | (0.0 to 1.8)  |
| Africa | Western Africa  | Low HDI    | Guinea-Bissau | 20               | 5.7%            | 4.7            | 6              | 0.8%           | 1.0          | 30               | 2.6%           | 2.7           |
|        |                 |            |               | (8 to 40)        | (2.0% to 10.4%) | (1.6 to 8.5)   | (<5 to 10)     | (0.4% to 1.5%) | (0.4 to 1.9) | (10 to 50)       | (0.9% to 4.7%) | (1.0 to 5.0)  |
| Africa | Western Africa  | Low HDI    | Liberia       | 70               | 5.2%            | 5.8            | 20             | 1.1%           | 1.6          | 100              | 2.8%           | 3.6           |
|        |                 |            |               | (30 to 120)      | (2.0% to 9.0%)  | (2.2 to 9.9)   | (10 to 40)     | (0.5% to 1.8%) | (0.7 to 2.8) | (40 to 160)      | (1.1% to 4.7%) | (1.4 to 6.2)  |
| Africa | Western Africa  | Low HDI    | Mali          | 60               | 1.1%            | 1.4            | 20             | 0.2%           | 0.3          | 70               | 0.5%           | 0.8           |
|        |                 |            |               | (<5 to 130)      | (0.0% to 2.5%)  | (0.0 to 3.1)   | (<5 to 40)     | (0.0% to 0.4%) | (0.0 to 0.8) | (<5 to 160)      | (0.0% to 1.2%) | (0.0 to 1.8)  |
| Africa | Western Africa  | Low HDI    | Mauritania    | <5               | 0.1%            | 0.1            | <5             | 0.0%           | 0.0          | <5               | 0.0%           | 0.0           |
|        |                 |            |               | (<5 to 200)      | (0.0% to 16.9%) | (0.0 to 16.3)  | (<5 to 10)     | (0.0% to 0.5%) | (0.0 to 0.2) | (<5 to 210)      | (0.0% to 6.9%) | (0.0 to 7.7)  |
| Africa | Western Africa  | Low HDI    | Niger         | 20               | 0.4%            | 0.3            | <5             | 0.0%           | 0.0          | 20               | 0.2%           | 0.2           |

|        |                    |               |                               |                      |                 |                |                    |                |               |                      |                 |               |
|--------|--------------------|---------------|-------------------------------|----------------------|-----------------|----------------|--------------------|----------------|---------------|----------------------|-----------------|---------------|
|        |                    |               |                               | (<5 to 80)           | (0.0% to 2.0%)  | (0.0 to 1.5)   | (<5 to 10)         | (0.0% to 0.2%) | (0.0 to 0.2)  | (<5 to 90)           | (0.0% to 0.9%)  | (0.0 to 0.8)  |
| Africa | Western Africa     | Low HDI       | Nigeria                       | 2 500                | 4.9%            | 5.4            | 2 000              | 2.8%           | 3.8           | 4 500                | 3.7%            | 4.6           |
|        |                    |               |                               | (1 500 to 3 400)     | (3.1% to 6.8%)  | (3.3 to 7.5)   | (1 300 to 2 900)   | (1.9% to 4.0%) | (2.2 to 5.8)  | (2 900 to 6 300)     | (2.4% to 5.2%)  | (2.8 to 6.6)  |
| Africa | Western Africa     | Low HDI       | Senegal                       | 30                   | 0.7%            | 0.8            | 6                  | 0.1%           | 0.1           | 40                   | 0.3%            | 0.4           |
|        |                    |               |                               | (<5 to 100)          | (0.0% to 2.5%)  | (0.0 to 2.6)   | (<5 to 20)         | (0.0% to 0.3%) | (0.0 to 0.4)  | (<5 to 120)          | (0.0% to 1.1%)  | (0.0 to 1.4)  |
| Africa | Western Africa     | Low HDI       | Sierra Leone                  | 90                   | 5.0%            | 4.9            | 30                 | 1.1%           | 1.4           | 120                  | 2.6%            | 3.1           |
|        |                    |               |                               | (40 to 150)          | (2.4% to 8.3%)  | (2.4 to 8.1)   | (20 to 50)         | (0.5% to 1.8%) | (0.7 to 2.5)  | (60 to 200)          | (1.2% to 4.3%)  | (1.5 to 5.2)  |
| Africa | Western Africa     | Low HDI       | The Republic of the Gambia    | 30                   | 6.7%            | 5.4            | <5                 | 0.5%           | 0.5           | 30                   | 3.3%            | 2.9           |
|        |                    |               |                               | (9 to 60)            | (2.0% to 13.3%) | (1.7 to 10.7)  | (<5 to 6)          | (0.2% to 1.0%) | (0.2 to 1.0)  | (10 to 70)           | (1.0% to 6.5%)  | (0.9 to 5.7)  |
| Africa | Western Africa     | Low HDI       | Togo                          | 50                   | 2.3%            | 2.7            | 20                 | 0.6%           | 0.8           | 70                   | 1.3%            | 1.7           |
|        |                    |               |                               | (10 to 90)           | (0.6% to 4.2%)  | (0.7 to 4.9)   | (5 to 30)          | (0.2% to 1.1%) | (0.2 to 1.5)  | (20 to 120)          | (0.3% to 2.5%)  | (0.4 to 3.1)  |
| Asia   | Eastern Asia       | High HDI      | China                         | 236 100              | 9.6%            | 21.9           | 46 200             | 2.2%           | 4.3           | 282 300              | 6.2%            | 13.0          |
|        |                    |               |                               | (142 300 to 329 200) | (5.8% to 13.4%) | (13.1 to 30.7) | (26 600 to 70 600) | (1.3% to 3.4%) | (2.3 to 6.8)  | (168 900 to 399 800) | (3.7% to 8.8%)  | (7.7 to 18.6) |
| Asia   | Eastern Asia       | Very high HDI | Japan                         | 30 100               | 5.1%            | 18.3           | 7 400              | 1.8%           | 5.0           | 37 600               | 3.7%            | 11.2          |
|        |                    |               |                               | (19 300 to 40 500)   | (3.3% to 6.8%)  | (11.8 to 24.6) | (4 500 to 11 200)  | (1.1% to 2.6%) | (2.6 to 8.1)  | (23 900 to 51 600)   | (2.3% to 5.1%)  | (6.9 to 15.8) |
| Asia   | Eastern Asia       | Missing       | Korea, Democratic Republic of | 1 300                | 4.8%            | 8.6            | 200                | 0.7%           | 1.1           | 1 500                | 2.6%            | 4.3           |
|        |                    |               |                               | (590 to 2 200)       | (2.2% to 8.2%)  | (3.9 to 14.7)  | (90 to 350)        | (0.3% to 1.2%) | (0.4 to 1.9)  | (680 to 2 600)       | (1.2% to 4.5%)  | (1.9 to 7.5)  |
| Asia   | Eastern Asia       | Very high HDI | Korea, Republic of            | 7 800                | 6.5%            | 17.7           | 2 400              | 2.2%           | 5.2           | 10 200               | 4.5%            | 10.9          |
|        |                    |               |                               | (5 000 to 10 700)    | (4.1% to 8.9%)  | (10.9 to 24.4) | (1 500 to 3 400)   | (1.4% to 3.2%) | (2.7 to 8.6)  | (6 500 to 14 100)    | (2.8% to 6.2%)  | (6.5 to 15.7) |
| Asia   | Eastern Asia       | High HDI      | Mongolia                      | 450                  | 15.0%           | 41.6           | 110                | 4.0%           | 8.3           | 560                  | 9.8%            | 23.0          |
|        |                    |               |                               | (180 to 720)         | (5.9% to 24.1%) | (17.3 to 67.2) | (50 to 190)        | (2.0% to 7.0%) | (4.1 to 14.8) | (230 to 910)         | (4.1% to 16.1%) | (9.9 to 37.9) |
| Asia   | South-Central Asia | Low HDI       | Afghanistan                   | 40                   | 0.4%            | 0.5            | 5                  | 0.0%           | 0.1           | 50                   | 0.2%            | 0.3           |
|        |                    |               |                               | (<5 to 1 800)        | (0.0% to 17.5%) | (0.0 to 22.4)  | (<5 to 430)        | (0.0% to 3.6%) | (0.0 to 6.4)  | (<5 to 2 200)        | (0.0% to 10.0%) | (0.0 to 14.2) |
| Asia   | South-Central Asia | Medium HDI    | Bangladesh                    | 860                  | 1.0%            | 1.2            | 60                 | 0.1%           | 0.1           | 920                  | 0.6%            | 0.6           |
|        |                    |               |                               | (<5 to 37 700)       | (0.0% to 43.1%) | (0.0 to 53.5)  | (<5 to 250)        | (0.0% to 0.4%) | (0.0 to 0.4)  | (<5 to 38 000)       | (0.0% to 24.4%) | (0.0 to 27.2) |



|      |                    |               |                           |                    |                 |               |                   |                |               |                    |                 |               |
|------|--------------------|---------------|---------------------------|--------------------|-----------------|---------------|-------------------|----------------|---------------|--------------------|-----------------|---------------|
| Asia | South-Central Asia | Medium HDI    | Bhutan                    | 10                 | 4.0%            | 3.4           | <5                | 0.7%           | 0.6           | 10                 | 2.5%            | 2.1           |
|      |                    |               |                           | (<5 to 20)         | (1.0% to 7.2%)  | (0.8 to 6.2)  | (<5 to <5)        | (0.2% to 1.3%) | (0.2 to 1.1)  | (<5 to 30)         | (0.6% to 4.5%)  | (0.5 to 3.9)  |
| Asia | South-Central Asia | Medium HDI    | India                     | 54 400             | 8.5%            | 8.5           | 7 800             | 1.1%           | 1.2           | 62 100             | 4.7%            | 4.8           |
|      |                    |               |                           | (23 500 to 78 100) | (3.7% to 12.2%) | (3.6 to 12.5) | (3 100 to 13 600) | (0.5% to 2.0%) | (0.5 to 2.1)  | (26 600 to 91 700) | (2.0% to 7.0%)  | (2.0 to 7.3)  |
| Asia | South-Central Asia | High HDI      | Iran, Islamic Republic of | 350                | 0.5%            | 0.9           | 100               | 0.2%           | 0.3           | 450                | 0.4%            | 0.6           |
|      |                    |               |                           | (60 to 5 100)      | (0.1% to 7.5%)  | (0.1 to 15.3) | (9 to 710)        | (0.0% to 1.2%) | (0.0 to 2.7)  | (70 to 5 800)      | (0.1% to 4.6%)  | (0.1 to 9.1)  |
| Asia | South-Central Asia | Very high HDI | Kazakhstan                | 990                | 6.2%            | 12.5          | 430               | 2.4%           | 3.8           | 1 400              | 4.2%            | 7.3           |
|      |                    |               |                           | (720 to 1 200)     | (4.5% to 7.5%)  | (9.1 to 15.4) | (260 to 630)      | (1.4% to 3.5%) | (2.1 to 5.7)  | (980 to 1 800)     | (2.9% to 5.4%)  | (4.9 to 9.5)  |
| Asia | South-Central Asia | Medium HDI    | Kyrgyzstan                | 170                | 5.2%            | 8.4           | 60                | 1.6%           | 2.1           | 220                | 3.3%            | 4.8           |
|      |                    |               |                           | (110 to 230)       | (3.4% to 7.3%)  | (5.4 to 11.7) | (40 to 80)        | (1.0% to 2.2%) | (1.3 to 3.2)  | (150 to 320)       | (2.1% to 4.6%)  | (3.0 to 6.8)  |
| Asia | South-Central Asia | High HDI      | Maldives                  | <5                 | 1.4%            | 2.0           | <5                | 0.3%           | 0.4           | <5                 | 0.9%            | 1.2           |
|      |                    |               |                           | (<5 to 6)          | (0.5% to 2.4%)  | (0.6 to 3.4)  | (<5 to <5)        | (0.1% to 0.5%) | (0.1 to 0.8)  | (<5 to 7)          | (0.3% to 1.5%)  | (0.4 to 2.2)  |
| Asia | South-Central Asia | Medium HDI    | Nepal                     | 190                | 2.1%            | 1.6           | 30                | 0.3%           | 0.3           | 220                | 1.1%            | 0.9           |
|      |                    |               |                           | (9 to 380)         | (0.1% to 4.2%)  | (0.1 to 3.3)  | (<5 to 70)        | (0.0% to 0.7%) | (0.0 to 0.6)  | (10 to 450)        | (0.1% to 2.2%)  | (0.0 to 1.8)  |
| Asia | South-Central Asia | Medium HDI    | Pakistan                  | 370                | 0.4%            | 0.5           | 50                | 0.1%           | 0.1           | 430                | 0.2%            | 0.3           |
|      |                    |               |                           | (40 to 23 000)     | (0.0% to 26.9%) | (0.1 to 31.6) | (7 to 7 800)      | (0.0% to 8.8%) | (0.0 to 11.3) | (40 to 30 800)     | (0.0% to 17.7%) | (0.0 to 21.6) |
| Asia | South-Central Asia | High HDI      | Sri Lanka                 | 1 100              | 7.6%            | 8.3           | 200               | 1.3%           | 1.3           | 1 300              | 4.3%            | 4.5           |
|      |                    |               |                           | (480 to 1 700)     | (3.4% to 11.9%) | (3.7 to 13.0) | (90 to 330)       | (0.6% to 2.2%) | (0.6 to 2.3)  | (560 to 2 000)     | (1.9% to 6.8%)  | (2.0 to 7.2)  |
| Asia | South-Central Asia | Medium HDI    | Tajikistan                | 50                 | 2.1%            | 1.9           | 10                | 0.4%           | 0.4           | 70                 | 1.2%            | 1.1           |
|      |                    |               |                           | (10 to 90)         | (0.4% to 3.4%)  | (0.4 to 3.2)  | (<5 to 30)        | (0.1% to 0.9%) | (0.1 to 0.8)  | (10 to 110)        | (0.2% to 2.0%)  | (0.2 to 1.9)  |
| Asia | South-Central Asia | High HDI      | Turkmenistan              | 190                | 6.6%            | 9.7           | 70                | 1.9%           | 2.6           | 260                | 4.0%            | 5.7           |
|      |                    |               |                           | (120 to 260)       | (4.2% to 9.0%)  | (6.1 to 13.4) | (40 to 110)       | (1.0% to 3.0%) | (1.3 to 4.4)  | (160 to 370)       | (2.4% to 5.7%)  | (3.4 to 8.3)  |
| Asia | South-Central Asia | High HDI      | Uzbekistan                | 510                | 3.6%            | 4.4           | 130               | 0.8%           | 0.9           | 640                | 2.0%            | 2.5           |
|      |                    |               |                           | (240 to 720)       | (1.7% to 5.1%)  | (2.1 to 6.3)  | (50 to 250)       | (0.3% to 1.4%) | (0.3 to 1.7)  | (290 to 970)       | (0.9% to 3.1%)  | (1.1 to 3.8)  |
| Asia | South-Eastern Asia | Very high HDI | Brunei                    | <5                 | 0.3%            | 0.7           | <5                | 0.1%           | 0.3           | <5                 | 0.2%            | 0.5           |
|      |                    |               |                           | (<5 to <5)         | (0.0% to 0.6%)  | (0.1 to 1.6)  | (<5 to <5)        | (0.0% to 0.2%) | (0.0 to 0.6)  | (<5 to <5)         | (0.0% to 0.4%)  | (0.1 to 1.1)  |

|      |                    |               |                                  |                   |                 |                |                |                |              |                   |                |               |
|------|--------------------|---------------|----------------------------------|-------------------|-----------------|----------------|----------------|----------------|--------------|-------------------|----------------|---------------|
| Asia | South-Eastern Asia | Medium HDI    | Cambodia                         | 730               | 8.8%            | 14.0           | 130            | 1.3%           | 1.8          | 850               | 4.7%           | 6.9           |
|      |                    |               |                                  | (300 to 1 200)    | (3.6% to 14.2%) | (5.7 to 22.7)  | (50 to 220)    | (0.5% to 2.2%) | (0.7 to 3.2) | (350 to 1 400)    | (1.9% to 7.7%) | (2.8 to 11.4) |
| Asia | South-Eastern Asia | High HDI      | Indonesia                        | 910               | 0.5%            | 0.8            | 190            | 0.1%           | 0.1          | 1 100             | 0.3%           | 0.4           |
|      |                    |               |                                  | (<5 to 3 200)     | (0.0% to 1.8%)  | (0.0 to 2.7)   | (<5 to 600)    | (0.0% to 0.3%) | (0.0 to 0.5) | (0 to 3 800)      | (0.0% to 1.0%) | (0.0 to 1.5)  |
| Asia | South-Eastern Asia | Medium HDI    | Lao People's Democratic Republic | 450               | 10.0%           | 19.8           | 80             | 1.8%           | 3.1          | 530               | 5.9%           | 10.9          |
|      |                    |               |                                  | (250 to 650)      | (5.6% to 14.6%) | (11.0 to 29.1) | (40 to 130)    | (1.0% to 2.8%) | (1.6 to 5.1) | (300 to 780)      | (3.3% to 8.7%) | (6.0 to 16.2) |
| Asia | South-Eastern Asia | Very high HDI | Malaysia                         | 230               | 1.0%            | 1.5            | 70             | 0.3%           | 0.4          | 290               | 0.6%           | 1.0           |
|      |                    |               |                                  | (<5 to 570)       | (0.0% to 2.5%)  | (0.0 to 3.8)   | (<5 to 160)    | (0.0% to 0.6%) | (0.0 to 1.0) | (<5 to 730)       | (0.0% to 1.5%) | (0.0 to 2.4)  |
| Asia | South-Eastern Asia | Medium HDI    | Myanmar                          | 1 900             | 5.8%            | 7.8            | 240            | 0.6%           | 0.8          | 2 200             | 3.0%           | 4.0           |
|      |                    |               |                                  | (570 to 3 300)    | (1.7% to 9.8%)  | (2.3 to 13.4)  | (70 to 430)    | (0.2% to 1.1%) | (0.2 to 1.6) | (650 to 3 700)    | (0.9% to 5.1%) | (1.2 to 7.0)  |
| Asia | South-Eastern Asia | High HDI      | Philippines                      | 3 900             | 5.8%            | 10.1           | 1 400          | 1.6%           | 3.1          | 5 300             | 3.5%           | 6.2           |
|      |                    |               |                                  | (2 100 to 5 600)  | (3.1% to 8.4%)  | (5.6 to 14.6)  | (740 to 2 200) | (0.9% to 2.6%) | (1.5 to 5.1) | (2 800 to 7 800)  | (1.8% to 5.1%) | (3.3 to 9.3)  |
| Asia | South-Eastern Asia | Very high HDI | Singapore                        | 170               | 1.4%            | 3.3            | 70             | 0.6%           | 1.3          | 230               | 1.0%           | 2.2           |
|      |                    |               |                                  | (50 to 310)       | (0.4% to 2.6%)  | (0.9 to 6.4)   | (20 to 110)    | (0.2% to 1.0%) | (0.4 to 2.4) | (70 to 420)       | (0.3% to 1.8%) | (0.6 to 4.3)  |
| Asia | South-Eastern Asia | High HDI      | Thailand                         | 8 200             | 8.9%            | 16.1           | 1 700          | 1.8%           | 2.9          | 9 900             | 5.3%           | 8.9           |
|      |                    |               |                                  | (4 600 to 12 000) | (5.0% to 13.1%) | (9.0 to 23.7)  | (930 to 2 500) | (1.0% to 2.6%) | (1.5 to 4.6) | (5 500 to 14 500) | (2.9% to 7.7%) | (4.9 to 13.3) |
| Asia | South-Eastern Asia | Medium HDI    | Timor-Leste                      | <5                | 0.2%            | 0.2            | <5             | 0.1%           | 0.1          | <5                | 0.1%           | 0.1           |
|      |                    |               |                                  | (<5 to <5)        | (0.0% to 0.7%)  | (0.0 to 0.7)   | (<5 to <5)     | (0.0% to 0.2%) | (0.0 to 0.2) | (<5 to <5)        | (0.0% to 0.4%) | (0.0 to 0.5)  |
| Asia | South-Eastern Asia | Medium HDI    | Viet Nam                         | 6 500             | 6.6%            | 13.3           | 850            | 1.0%           | 1.4          | 7 400             | 4.1%           | 6.8           |
|      |                    |               |                                  | (2 900 to 10 800) | (3.0% to 11.0%) | (5.8 to 22.0)  | (390 to 1 500) | (0.5% to 1.8%) | (0.6 to 2.6) | (3 300 to 12 300) | (1.8% to 6.8%) | (3.0 to 11.4) |
| Asia | Western Asia       | High HDI      | Armenia                          | 130               | 2.8%            | 7.4            | 60             | 1.3%           | 2.3          | 190               | 2.1%           | 4.4           |
|      |                    |               |                                  | (70 to 190)       | (1.4% to 4.0%)  | (3.7 to 10.8)  | (30 to 90)     | (0.7% to 2.2%) | (1.1 to 4.0) | (100 to 290)      | (1.1% to 3.1%) | (2.2 to 6.8)  |
| Asia | Western Asia       | High HDI      | Azerbaijan                       | 220               | 2.7%            | 4.6            | 60             | 0.8%           | 1.0          | 280               | 1.8%           | 2.6           |
|      |                    |               |                                  | (100 to 330)      | (1.2% to 4.2%)  | (2.0 to 7.2)   | (30 to 110)    | (0.3% to 1.4%) | (0.4 to 2.0) | (120 to 450)      | (0.8% to 2.8%) | (1.1 to 4.3)  |
| Asia | Western Asia       | Very high HDI | Bahrain                          | 5                 | 0.9%            | 1.0            | <5             | 0.3%           | 0.4          | 7                 | 0.6%           | 0.7           |
|      |                    |               |                                  | (<5 to 10)        | (0.3% to 1.7%)  | (0.2 to 2.1)   | (<5 to <5)     | (0.1% to 0.6%) | (0.1 to 0.9) | (<5 to 10)        | (0.2% to 1.1%) | (0.2 to 1.6)  |

|      |              |               |                          |                |                |               |              |                |              |                |                |               |
|------|--------------|---------------|--------------------------|----------------|----------------|---------------|--------------|----------------|--------------|----------------|----------------|---------------|
| Asia | Western Asia | Medium HDI    | Gaza Strip and West Bank | 20             | 1.1%           | 1.9           | 10           | 0.4%           | 0.7          | 30             | 0.7%           | 1.3           |
|      |              |               |                          | (20 to 40)     | (0.7% to 1.9%) | (1.2 to 3.7)  | (6 to 10)    | (0.2% to 0.6%) | (0.4 to 1.2) | (20 to 60)     | (0.5% to 1.2%) | (0.8 to 2.4)  |
| Asia | Western Asia | High HDI      | Georgia                  | 360            | 5.5%           | 12.9          | 160          | 2.6%           | 4.6          | 520            | 4.1%           | 8.1           |
|      |              |               |                          | (250 to 440)   | (3.9% to 6.9%) | (9.0 to 16.1) | (100 to 230) | (1.6% to 3.7%) | (2.4 to 7.2) | (350 to 680)   | (2.8% to 5.3%) | (5.2 to 10.9) |
| Asia | Western Asia | Medium HDI    | Iraq                     | 40             | 0.3%           | 0.4           | 20           | 0.1%           | 0.1          | 50             | 0.2%           | 0.2           |
|      |              |               |                          | (<5 to 570)    | (0.0% to 4.1%) | (0.0 to 8.6)  | (<5 to 50)   | (0.0% to 0.3%) | (0.0 to 0.5) | (<5 to 620)    | (0.0% to 1.8%) | (0.0 to 4.2)  |
| Asia | Western Asia | Very high HDI | Israel                   | 110            | 0.8%           | 2.0           | 90           | 0.6%           | 1.6          | 200            | 0.7%           | 1.8           |
|      |              |               |                          | (30 to 210)    | (0.2% to 1.5%) | (0.6 to 3.8)  | (40 to 150)  | (0.3% to 1.0%) | (0.6 to 2.8) | (70 to 350)    | (0.2% to 1.2%) | (0.6 to 3.3)  |
| Asia | Western Asia | High HDI      | Jordan                   | 20             | 0.4%           | 0.6           | 7            | 0.1%           | 0.2          | 30             | 0.2%           | 0.4           |
|      |              |               |                          | (<5 to 110)    | (0.0% to 2.2%) | (0.0 to 1.5)  | (<5 to 20)   | (0.0% to 0.3%) | (0.0 to 0.6) | (<5 to 130)    | (0.0% to 1.2%) | (0.0 to 1.0)  |
| Asia | Western Asia | Very high HDI | Kuwait                   | <5             | 0.0%           | 0.0           | <5           | 0.0%           | 0.0          | <5             | 0.0%           | 0.0           |
|      |              |               |                          | (<5 to 150)    | (0.0% to 8.4%) | (0.0 to 9.5)  | (<5 to <5)   | (0.0% to 0.2%) | (0.0 to 0.8) | (<5 to 160)    | (0.0% to 4.1%) | (0.0 to 6.1)  |
| Asia | Western Asia | High HDI      | Lebanon                  | 40             | 0.7%           | 1.1           | 20           | 0.3%           | 0.6          | 60             | 0.5%           | 0.9           |
|      |              |               |                          | (7 to 70)      | (0.1% to 1.2%) | (0.2 to 2.1)  | (5 to 40)    | (0.1% to 0.7%) | (0.1 to 1.5) | (10 to 110)    | (0.1% to 0.9%) | (0.1 to 1.8)  |
| Asia | Western Asia | Very high HDI | Oman                     | 6              | 0.3%           | 0.3           | <5           | 0.1%           | 0.1          | 8              | 0.2%           | 0.3           |
|      |              |               |                          | (<5 to 20)     | (0.0% to 0.8%) | (0.0 to 1.0)  | (<5 to <5)   | (0.0% to 0.3%) | (0.0 to 0.4) | (<5 to 20)     | (0.0% to 0.6%) | (0.0 to 0.8)  |
| Asia | Western Asia | Very high HDI | Qatar                    | 6              | 0.7%           | 0.9           | <5           | 0.2%           | 0.3          | 7              | 0.5%           | 0.7           |
|      |              |               |                          | (<5 to 10)     | (0.1% to 1.5%) | (0.1 to 2.3)  | (<5 to <5)   | (0.0% to 0.5%) | (0.1 to 1.0) | (<5 to 20)     | (0.1% to 1.1%) | (0.1 to 1.7)  |
| Asia | Western Asia | Very high HDI | Saudi Arabia             | 10             | 0.1%           | 0.1           | <5           | 0.0%           | 0.0          | 10             | 0.1%           | 0.1           |
|      |              |               |                          | (<5 to 1 200)  | (0.0% to 8.3%) | (0.0 to 9.9)  | (<5 to 10)   | (0.0% to 0.1%) | (0.0 to 0.1) | (<5 to 1 200)  | (0.0% to 4.3%) | (0.0 to 5.7)  |
| Asia | Western Asia | Low HDI       | Syrian Arab Republic     | 20             | 0.2%           | 0.3           | 10           | 0.1%           | 0.2          | 40             | 0.2%           | 0.3           |
|      |              |               |                          | (8 to 120)     | (0.1% to 1.3%) | (0.1 to 2.0)  | (<5 to 30)   | (0.0% to 0.3%) | (0.0 to 0.5) | (10 to 150)    | (0.1% to 0.7%) | (0.1 to 1.2)  |
| Asia | Western Asia | Very high HDI | Turkey                   | 1 200          | 0.9%           | 2.9           | 300          | 0.3%           | 0.6          | 1 500          | 0.7%           | 1.6           |
|      |              |               |                          | (430 to 1 800) | (0.3% to 1.4%) | (0.9 to 4.4)  | (70 to 530)  | (0.1% to 0.5%) | (0.1 to 1.2) | (500 to 2 300) | (0.2% to 1.0%) | (0.5 to 2.6)  |
| Asia | Western Asia | Very high HDI | United Arab Emirates     | 30             | 1.4%           | 1.0           | 9            | 0.3%           | 0.6          | 40             | 0.8%           | 0.9           |
|      |              |               |                          | (8 to 50)      | (0.4% to 2.2%) | (0.2 to 1.9)  | (<5 to 20)   | (0.1% to 0.7%) | (0.1 to 1.5) | (10 to 70)     | (0.2% to 1.4%) | (0.2 to 1.7)  |

|        |                            |               |                     |                    |                 |                |                   |                |               |                    |                |                |
|--------|----------------------------|---------------|---------------------|--------------------|-----------------|----------------|-------------------|----------------|---------------|--------------------|----------------|----------------|
| Asia   | Western Asia               | Low HDI       | Yemen               | 20                 | 0.3%            | 0.4            | 7                 | 0.1%           | 0.1           | 30                 | 0.2%           | 0.2            |
|        |                            |               |                     | (<5 to 660)        | (0.0% to 9.4%)  | (0.0 to 11.3)  | (<5 to 300)       | (0.0% to 3.3%) | (0.0 to 4.1)  | (<5 to 960)        | (0.0% to 5.9%) | (0.0 to 7.5)   |
| Europe | Central and Eastern Europe | Very high HDI | Belarus             | 1 800              | 8.6%            | 27.8           | 800               | 4.2%           | 8.3           | 2 600              | 6.5%           | 16.3           |
|        |                            |               |                     | (1 500 to 2 100)   | (6.8% to 10.0%) | (21.7 to 32.4) | (550 to 1 100)    | (2.9% to 5.5%) | (4.9 to 12.0) | (2 000 to 3 200)   | (4.9% to 7.9%) | (11.8 to 20.3) |
| Europe | Central and Eastern Europe | Very high HDI | Bulgaria            | 1 000              | 5.3%            | 15.3           | 420               | 2.8%           | 5.8           | 1 500              | 4.2%           | 10.0           |
|        |                            |               |                     | (790 to 1 200)     | (4.1% to 6.3%)  | (11.4 to 18.5) | (270 to 580)      | (1.8% to 3.8%) | (3.2 to 8.7)  | (1 100 to 1 800)   | (3.1% to 5.2%) | (6.9 to 13.0)  |
| Europe | Central and Eastern Europe | Very high HDI | Czechia             | 1 900              | 5.5%            | 18.8           | 970               | 3.3%           | 8.7           | 2 900              | 4.5%           | 13.2           |
|        |                            |               |                     | (1 500 to 2 200)   | (4.4% to 6.4%)  | (14.6 to 22.2) | (650 to 1 300)    | (2.2% to 4.5%) | (5.2 to 12.7) | (2 200 to 3 500)   | (3.4% to 5.6%) | (9.5 to 16.9)  |
| Europe | Central and Eastern Europe | Very high HDI | Hungary             | 2 200              | 7.0%            | 26.9           | 870               | 2.8%           | 8.5           | 3 100              | 4.9%           | 16.5           |
|        |                            |               |                     | (1 700 to 2 600)   | (5.4% to 8.4%)  | (20.4 to 32.7) | (600 to 1 200)    | (1.9% to 3.9%) | (5.1 to 12.6) | (2 300 to 3 800)   | (3.7% to 6.1%) | (11.8 to 21.2) |
| Europe | Central and Eastern Europe | Very high HDI | Poland              | 6 300              | 6.3%            | 19.6           | 2 400             | 2.5%           | 6.4           | 8 700              | 4.4%           | 12.2           |
|        |                            |               |                     | (4 700 to 7 500)   | (4.8% to 7.6%)  | (14.5 to 23.7) | (1 600 to 3 500)  | (1.6% to 3.6%) | (3.6 to 9.8)  | (6 300 to 11 000)  | (3.2% to 5.6%) | (8.4 to 15.9)  |
| Europe | Central and Eastern Europe | High HDI      | Republic of Moldova | 800                | 11.1%           | 30.8           | 240               | 4.1%           | 6.9           | 1 000              | 7.9%           | 17.1           |
|        |                            |               |                     | (630 to 940)       | (8.6% to 12.9%) | (23.7 to 36.3) | (160 to 340)      | (2.6% to 5.7%) | (4.0 to 10.4) | (780 to 1 300)     | (5.9% to 9.7%) | (12.5 to 21.4) |
| Europe | Central and Eastern Europe | Very high HDI | Romania             | 4 700              | 9.2%            | 29.1           | 1 700             | 3.9%           | 8.7           | 6 500              | 6.8%           | 18.0           |
|        |                            |               |                     | (3 500 to 5 700)   | (6.8% to 10.9%) | (21.6 to 34.8) | (1 100 to 2 400)  | (2.5% to 5.5%) | (5.1 to 13.0) | (4 600 to 8 000)   | (4.9% to 8.4%) | (12.6 to 22.9) |
| Europe | Central and Eastern Europe | Very high HDI | Russian Federation  | 23 200             | 8.4%            | 23.8           | 11 200            | 3.7%           | 8.0           | 34 400             | 6.0%           | 14.3           |
|        |                            |               |                     | (18 600 to 26 900) | (6.7% to 9.7%)  | (18.9 to 27.7) | (7 800 to 14 900) | (2.6% to 5.0%) | (5.1 to 11.3) | (26 400 to 41 800) | (4.6% to 7.3%) | (10.6 to 17.8) |
| Europe | Central and Eastern Europe | Very high HDI | Slovakia            | 1 300              | 7.8%            | 29.1           | 350               | 2.6%           | 6.7           | 1 600              | 5.4%           | 16.7           |
|        |                            |               |                     | (960 to 1 500)     | (6.0% to 9.4%)  | (21.9 to 35.3) | (230 to 490)      | (1.7% to 3.6%) | (3.9 to 9.9)  | (1 200 to 2 000)   | (4.0% to 6.8%) | (12.0 to 21.3) |
| Europe | Central and Eastern Europe | High HDI      | Ukraine             | 6 600              | 8.5%            | 21.1           | 2 500             | 3.1%           | 5.6           | 9 100              | 5.8%           | 11.9           |
|        |                            |               |                     | (5 100 to 7 700)   | (6.5% to 9.9%)  | (16.0 to 24.9) | (1 600 to 3 500)  | (2.0% to 4.4%) | (3.2 to 8.5)  | (6 700 to 11 200)  | (4.3% to 7.1%) | (8.4 to 15.2)  |
| Europe | Northern Europe            | Very high HDI | Denmark             | 980                | 4.7%            | 16.7           | 520               | 2.7%           | 9.4           | 1 500              | 3.8%           | 12.9           |
|        |                            |               |                     | (710 to 1 200)     | (3.4% to 5.9%)  | (12.0 to 20.9) | (340 to 720)      | (1.8% to 3.7%) | (5.6 to 13.9) | (1 100 to 1 900)   | (2.6% to 4.8%) | (8.6 to 17.2)  |

|        |                 |               |                        |                   |                |                |                  |                |               |                    |                |                |
|--------|-----------------|---------------|------------------------|-------------------|----------------|----------------|------------------|----------------|---------------|--------------------|----------------|----------------|
| Europe | Northern Europe | Very high HDI | Estonia                | 170               | 4.2%           | 15.3           | 100              | 2.6%           | 6.6           | 270                | 3.5%           | 10.0           |
|        |                 |               |                        | (130 to 200)      | (3.3% to 5.0%) | (11.7 to 18.4) | (70 to 130)      | (1.8% to 3.6%) | (3.8 to 10.1) | (200 to 340)       | (2.6% to 4.4%) | (7.0 to 13.2)  |
| Europe | Northern Europe | Very high HDI | Finland                | 700               | 4.0%           | 11.3           | 560              | 3.5%           | 9.3           | 1 300              | 3.8%           | 10.1           |
|        |                 |               |                        | (520 to 850)      | (3.0% to 4.8%) | (8.4 to 13.8)  | (370 to 790)     | (2.3% to 4.9%) | (5.5 to 14.0) | (890 to 1 600)     | (2.6% to 4.9%) | (6.8 to 13.7)  |
| Europe | Northern Europe | Very high HDI | Iceland                | 20                | 2.9%           | 8.0            | 10               | 1.6%           | 4.3           | 40                 | 2.3%           | 6.1            |
|        |                 |               |                        | (10 to 30)        | (1.8% to 3.8%) | (4.8 to 10.7)  | (7 to 20)        | (1.0% to 2.5%) | (2.2 to 7.1)  | (20 to 50)         | (1.4% to 3.2%) | (3.5 to 8.8)   |
| Europe | Northern Europe | Very high HDI | Ireland                | 670               | 4.6%           | 16.7           | 380              | 3.0%           | 9.9           | 1 000              | 3.9%           | 13.1           |
|        |                 |               |                        | (510 to 790)      | (3.6% to 5.5%) | (12.8 to 20.1) | (260 to 520)     | (2.1% to 4.1%) | (5.9 to 14.3) | (780 to 1 300)     | (2.9% to 4.8%) | (9.2 to 17.0)  |
| Europe | Northern Europe | Very high HDI | Latvia                 | 370               | 6.1%           | 23.7           | 140              | 2.4%           | 6.6           | 510                | 4.3%           | 13.4           |
|        |                 |               |                        | (280 to 430)      | (4.5% to 7.1%) | (17.7 to 28.1) | (90 to 200)      | (1.6% to 3.3%) | (3.6 to 10.0) | (370 to 630)       | (3.1% to 5.2%) | (9.3 to 17.1)  |
| Europe | Northern Europe | Very high HDI | Lithuania              | 530               | 6.3%           | 22.9           | 260              | 3.2%           | 8.2           | 790                | 4.8%           | 14.2           |
|        |                 |               |                        | (430 to 610)      | (5.1% to 7.3%) | (18.2 to 26.8) | (180 to 350)     | (2.2% to 4.3%) | (4.7 to 11.9) | (610 to 970)       | (3.7% to 5.8%) | (10.3 to 17.8) |
| Europe | Northern Europe | Very high HDI | Norway                 | 610               | 3.4%           | 11.9           | 310              | 2.1%           | 6.6           | 920                | 2.8%           | 9.1            |
|        |                 |               |                        | (400 to 800)      | (2.3% to 4.5%) | (7.6 to 15.6)  | (170 to 460)     | (1.2% to 3.1%) | (3.4 to 10.5) | (570 to 1 300)     | (1.8% to 3.8%) | (5.4 to 12.9)  |
| Europe | Northern Europe | Very high HDI | Sweden                 | 990               | 3.2%           | 9.5            | 620              | 2.3%           | 6.6           | 1 600              | 2.8%           | 8.0            |
|        |                 |               |                        | (660 to 1 300)    | (2.2% to 4.1%) | (6.3 to 12.3)  | (350 to 920)     | (1.3% to 3.5%) | (3.4 to 10.3) | (1 000 to 2 200)   | (1.8% to 3.8%) | (4.8 to 11.2)  |
| Europe | Northern Europe | Very high HDI | United Kingdom         | 10 600            | 4.9%           | 16.5           | 6 300            | 3.2%           | 9.8           | 16 800             | 4.1%           | 13.0           |
|        |                 |               |                        | (8 100 to 12 600) | (3.8% to 5.9%) | (12.6 to 19.9) | (4 100 to 8 700) | (2.1% to 4.4%) | (5.8 to 14.4) | (12 200 to 21 300) | (3.0% to 5.2%) | (9.1 to 16.9)  |
| Europe | Southern Europe | High HDI      | Albania                | 120               | 2.9%           | 4.9            | 50               | 1.8%           | 2.2           | 170                | 2.5%           | 3.5            |
|        |                 |               |                        | (70 to 150)       | (1.8% to 3.8%) | (3.0 to 6.5)   | (30 to 80)       | (1.0% to 2.9%) | (1.0 to 3.9)  | (100 to 230)       | (1.5% to 3.4%) | (2.0 to 5.1)   |
| Europe | Southern Europe | High HDI      | Bosnia and Herzegovina | 350               | 4.4%           | 11.4           | 90               | 1.4%           | 2.9           | 440                | 3.1%           | 6.8            |
|        |                 |               |                        | (210 to 450)      | (2.7% to 5.9%) | (7.0 to 15.0)  | (50 to 140)      | (0.8% to 2.2%) | (1.4 to 4.8)  | (260 to 600)       | (1.8% to 4.2%) | (4.0 to 9.4)   |
| Europe | Southern Europe | Very high HDI | Croatia                | 800               | 5.9%           | 20.0           | 290              | 2.5%           | 6.5           | 1 100              | 4.3%           | 12.6           |
|        |                 |               |                        | (620 to 940)      | (4.6% to 7.0%) | (15.2 to 24.0) | (190 to 400)     | (1.7% to 3.5%) | (3.7 to 9.7)  | (810 to 1 300)     | (3.2% to 5.3%) | (8.9 to 16.0)  |
| Europe | Southern Europe | Very high HDI | Cyprus                 | 110               | 3.9%           | 11.3           | 60               | 2.7%           | 6.7           | 170                | 3.3%           | 8.8            |
|        |                 |               |                        | (80 to 130)       | (3.0% to 4.7%) | (8.6 to 13.8)  | (40 to 90)       | (1.8% to 3.8%) | (3.8 to 10.2) | (120 to 210)       | (2.4% to 4.3%) | (6.0 to 11.8)  |

|        |                 |               |                                           |                    |                |                |                   |                |               |                    |                |                |
|--------|-----------------|---------------|-------------------------------------------|--------------------|----------------|----------------|-------------------|----------------|---------------|--------------------|----------------|----------------|
| Europe | Southern Europe | Very high HDI | Greece                                    | 1 500              | 4.2%           | 12.4           | 680               | 2.5%           | 5.6           | 2 200              | 3.5%           | 8.8            |
|        |                 |               |                                           | (1 000 to 1 900)   | (3.0% to 5.4%) | (8.7 to 15.7)  | (430 to 990)      | (1.6% to 3.6%) | (3.1 to 8.8)  | (1 500 to 2 900)   | (2.4% to 4.6%) | (5.7 to 11.9)  |
| Europe | Southern Europe | Very high HDI | Italy                                     | 6 900              | 3.4%           | 10.6           | 3 200             | 1.8%           | 4.9           | 10 100             | 2.6%           | 7.6            |
|        |                 |               |                                           | (4 100 to 9 200)   | (2.1% to 4.6%) | (6.4 to 14.3)  | (1 900 to 4 700)  | (1.0% to 2.6%) | (2.5 to 7.8)  | (6 000 to 14 000)  | (1.6% to 3.6%) | (4.4 to 10.8)  |
| Europe | Southern Europe | Very high HDI | Malta                                     | 40                 | 2.8%           | 7.6            | 20                | 1.8%           | 4.5           | 60                 | 2.3%           | 5.9            |
|        |                 |               |                                           | (20 to 50)         | (1.9% to 3.6%) | (5.0 to 9.9)   | (10 to 30)        | (1.1% to 2.5%) | (2.4 to 6.9)  | (40 to 70)         | (1.5% to 3.1%) | (3.6 to 8.2)   |
| Europe | Southern Europe | Very high HDI | Montenegro                                | 90                 | 6.0%           | 17.2           | 40                | 2.9%           | 7.1           | 130                | 4.5%           | 11.8           |
|        |                 |               |                                           | (70 to 110)        | (4.4% to 7.2%) | (12.3 to 21.1) | (20 to 50)        | (1.8% to 4.1%) | (3.9 to 10.9) | (90 to 160)        | (3.2% to 5.8%) | (7.8 to 15.6)  |
| Europe | Southern Europe | Very high HDI | Portugal                                  | 2 700              | 8.2%           | 26.6           | 880               | 3.5%           | 7.9           | 3 500              | 6.1%           | 16.4           |
|        |                 |               |                                           | (2 100 to 3 100)   | (6.4% to 9.6%) | (20.8 to 31.4) | (580 to 1 200)    | (2.3% to 4.8%) | (4.6 to 11.7) | (2 700 to 4 300)   | (4.6% to 7.5%) | (12.0 to 20.7) |
| Europe | Southern Europe | High HDI      | Serbia                                    | 1 500              | 6.3%           | 20.1           | 680               | 3.0%           | 8.4           | 2 200              | 4.7%           | 13.7           |
|        |                 |               |                                           | (1 200 to 1 800)   | (4.8% to 7.4%) | (15.1 to 24.1) | (440 to 960)      | (1.9% to 4.2%) | (4.7 to 12.9) | (1 600 to 2 800)   | (3.4% to 5.9%) | (9.5 to 17.9)  |
| Europe | Southern Europe | Very high HDI | Slovenia                                  | 450                | 5.8%           | 21.6           | 150               | 2.5%           | 6.8           | 590                | 4.4%           | 13.8           |
|        |                 |               |                                           | (340 to 550)       | (4.4% to 7.1%) | (16.0 to 26.6) | (100 to 200)      | (1.7% to 3.4%) | (4.0 to 10.1) | (440 to 750)       | (3.2% to 5.5%) | (9.7 to 17.9)  |
| Europe | Southern Europe | Very high HDI | Spain                                     | 8 500              | 5.7%           | 18.5           | 3 100             | 2.8%           | 6.6           | 11 600             | 4.4%           | 12.2           |
|        |                 |               |                                           | (6 100 to 10 500)  | (4.1% to 7.0%) | (13.2 to 22.9) | (1 900 to 4 400)  | (1.8% to 4.0%) | (3.6 to 10.1) | (8 000 to 14 900)  | (3.1% to 5.7%) | (8.2 to 16.0)  |
| Europe | Southern Europe | High HDI      | The former Yugoslav Republic of Macedonia | 130                | 3.2%           | 8.1            | 50                | 1.4%           | 2.7           | 180                | 2.4%           | 5.2            |
|        |                 |               |                                           | (70 to 180)        | (1.8% to 4.3%) | (4.4 to 11.1)  | (20 to 70)        | (0.6% to 2.2%) | (1.1 to 4.8)  | (90 to 250)        | (1.3% to 3.4%) | (2.7 to 7.7)   |
| Europe | Western Europe  | Very high HDI | Austria                                   | 1 100              | 4.9%           | 13.2           | 620               | 3.0%           | 7.1           | 1 800              | 4.0%           | 9.9            |
|        |                 |               |                                           | (860 to 1 400)     | (3.7% to 5.9%) | (10.0 to 16.1) | (410 to 870)      | (2.0% to 4.1%) | (4.2 to 10.5) | (1 300 to 2 300)   | (2.9% to 5.1%) | (6.9 to 13.0)  |
| Europe | Western Europe  | Very high HDI | Belgium                                   | 2 100              | 5.2%           | 19.0           | 1 200             | 3.4%           | 10.9          | 3 200              | 4.4%           | 14.7           |
|        |                 |               |                                           | (1 600 to 2 500)   | (4.0% to 6.3%) | (14.2 to 23.2) | (780 to 1 600)    | (2.2% to 4.7%) | (6.4 to 16.2) | (2 300 to 4 100)   | (3.2% to 5.6%) | (10.1 to 19.4) |
| Europe | Western Europe  | Very high HDI | France                                    | 13 500             | 5.8%           | 21.8           | 6 400             | 3.4%           | 10.5          | 20 000             | 4.7%           | 15.8           |
|        |                 |               |                                           | (10 300 to 16 600) | (4.4% to 7.1%) | (16.4 to 26.8) | (4 300 to 8 700)  | (2.3% to 4.6%) | (6.3 to 15.3) | (14 700 to 25 200) | (3.5% to 6.0%) | (11.1 to 20.6) |
| Europe | Western Europe  | Very high HDI | Germany                                   | 13 600             | 4.7%           | 15.1           | 7 900             | 3.2%           | 8.9           | 21 500             | 4.0%           | 11.8           |
|        |                 |               |                                           | (10 400 to 16 400) | (3.6% to 5.7%) | (11.5 to 18.2) | (5 300 to 10 700) | (2.1% to 4.3%) | (5.3 to 12.9) | (15 700 to 27 100) | (2.9% to 5.0%) | (8.3 to 15.3)  |

|                                 |                                 |               |                                 |                    |                |                |                  |                |               |                    |                |               |
|---------------------------------|---------------------------------|---------------|---------------------------------|--------------------|----------------|----------------|------------------|----------------|---------------|--------------------|----------------|---------------|
| Europe                          | Western Europe                  | Very high HDI | Luxembourg                      | 80                 | 5.0%           | 15.7           | 50               | 3.5%           | 9.9           | 130                | 4.3%           | 12.5          |
|                                 |                                 |               |                                 | (60 to 100)        | (3.7% to 6.2%) | (11.1 to 19.8) | (30 to 70)       | (2.2% to 4.9%) | (5.4 to 15.4) | (90 to 170)        | (3.0% to 5.6%) | (8.1 to 17.3) |
| Europe                          | Western Europe                  | Very high HDI | Switzerland                     | 1 200              | 4.8%           | 14.1           | 690              | 3.1%           | 8.2           | 1 900              | 4.0%           | 11.0          |
|                                 |                                 |               |                                 | (880 to 1 500)     | (3.5% to 5.9%) | (10.2 to 17.4) | (450 to 980)     | (2.0% to 4.3%) | (4.8 to 12.3) | (1 300 to 2 500)   | (2.8% to 5.2%) | (7.4 to 14.7) |
| Europe                          | Western Europe                  | Very high HDI | The Netherlands                 | 2 700              | 4.4%           | 14.8           | 1 500            | 2.8%           | 9.0           | 4 200              | 3.7%           | 11.8          |
|                                 |                                 |               |                                 | (2 000 to 3 400)   | (3.3% to 5.4%) | (11.1 to 18.4) | (980 to 2 100)   | (1.9% to 4.1%) | (5.2 to 13.8) | (3 000 to 5 500)   | (2.6% to 4.8%) | (8.0 to 15.9) |
| Latin America and the Caribbean | Latin America and the Caribbean | Very high HDI | Argentina                       | 2 700              | 4.5%           | 10.2           | 1 700            | 2.5%           | 5.6           | 4 400              | 3.4%           | 7.6           |
|                                 |                                 |               |                                 | (1 900 to 3 400)   | (3.2% to 5.6%) | (7.1 to 12.9)  | (1 100 to 2 400) | (1.6% to 3.6%) | (3.1 to 8.7)  | (3 000 to 5 800)   | (2.3% to 4.6%) | (4.9 to 10.4) |
| Latin America and the Caribbean | Latin America and the Caribbean | Very high HDI | Bahamas                         | 8                  | 1.9%           | 3.5            | <5               | 0.9%           | 1.5           | 10                 | 1.4%           | 2.3           |
|                                 |                                 |               |                                 | (5 to 10)          | (1.2% to 2.6%) | (2.2 to 4.9)   | (<5 to 6)        | (0.6% to 1.4%) | (0.7 to 2.5)  | (8 to 20)          | (0.9% to 2.0%) | (1.4 to 3.5)  |
| Latin America and the Caribbean | Latin America and the Caribbean | Very high HDI | Barbados                        | 20                 | 3.5%           | 8.4            | 10               | 1.8%           | 4.1           | 30                 | 2.6%           | 6.0           |
|                                 |                                 |               |                                 | (10 to 20)         | (2.5% to 4.4%) | (5.6 to 10.9)  | (6 to 20)        | (1.0% to 2.6%) | (1.9 to 6.8)  | (20 to 40)         | (1.8% to 3.5%) | (3.6 to 8.5)  |
| Latin America and the Caribbean | Latin America and the Caribbean | High HDI      | Belize                          | 5                  | 3.2%           | 4.3            | <5               | 1.7%           | 2.4           | 9                  | 2.4%           | 3.4           |
|                                 |                                 |               |                                 | (<5 to 8)          | (1.7% to 5.0%) | (1.9 to 7.0)   | (<5 to 5)        | (1.0% to 2.7%) | (1.2 to 4.0)  | (5 to 10)          | (1.3% to 3.8%) | (1.5 to 5.5)  |
| Latin America and the Caribbean | Latin America and the Caribbean | High HDI      | Bolivia, Plurinational State of | 160                | 2.4%           | 3.2            | 70               | 0.8%           | 1.4           | 230                | 1.5%           | 2.2           |
|                                 |                                 |               |                                 | (80 to 240)        | (1.3% to 3.6%) | (1.6 to 4.8)   | (30 to 120)      | (0.4% to 1.4%) | (0.6 to 2.5)  | (120 to 350)       | (0.8% to 2.3%) | (1.1 to 3.6)  |
| Latin America and the Caribbean | Latin America and the Caribbean | High HDI      | Brazil                          | 14 500             | 5.2%           | 12.5           | 6 000            | 2.2%           | 4.4           | 20 500             | 3.7%           | 8.0           |
|                                 |                                 |               |                                 | (10 100 to 17 900) | (3.6% to 6.4%) | (8.6 to 15.7)  | (3 500 to 9 200) | (1.3% to 3.3%) | (2.2 to 7.2)  | (13 700 to 27 100) | (2.5% to 4.9%) | (5.1 to 11.0) |
| Latin America and the Caribbean | Latin America and the Caribbean | Very high HDI | Chile                           | 980                | 3.6%           | 7.8            | 500              | 2.1%           | 3.5           | 1 500              | 2.9%           | 5.4           |
|                                 |                                 |               |                                 | (670 to 1 300)     | (2.4% to 4.6%) | (5.2 to 10.0)  | (300 to 720)     | (1.2% to 3.0%) | (1.9 to 5.4)  | (960 to 2 000)     | (1.9% to 3.8%) | (3.3 to 7.4)  |
| Latin America and the Caribbean | Latin America and the Caribbean | High HDI      | Colombia                        | 980                | 1.9%           | 3.8            | 530              | 0.9%           | 1.7           | 1 500              | 1.4%           | 2.6           |
|                                 |                                 |               |                                 | (510 to 1 400)     | (1.0% to 2.7%) | (1.9 to 5.4)   | (260 to 820)     | (0.4% to 1.4%) | (0.7 to 2.9)  | (760 to 2 200)     | (0.7% to 2.0%) | (1.3 to 4.0)  |
| Latin America and the Caribbean | Latin America and the Caribbean | High HDI      | Costa Rica                      | 120                | 2.0%           | 3.8            | 50               | 0.8%           | 1.6           | 170                | 1.4%           | 2.6           |
|                                 |                                 |               |                                 | (60 to 180)        | (1.0% to 3.1%) | (1.8 to 6.0)   | (20 to 80)       | (0.4% to 1.4%) | (0.7 to 2.8)  | (80 to 270)        | (0.7% to 2.2%) | (1.2 to 4.3)  |

|                                 |                                 |            |                    |                |                |               |             |                |              |                |                |              |
|---------------------------------|---------------------------------|------------|--------------------|----------------|----------------|---------------|-------------|----------------|--------------|----------------|----------------|--------------|
| Latin America and the Caribbean | Latin America and the Caribbean | High HDI   | Cuba               | 920            | 4.0%           | 9.2           | 200         | 1.0%           | 1.9          | 1 100          | 2.6%           | 5.4          |
|                                 |                                 |            |                    | (490 to 1 300) | (2.1% to 5.6%) | (4.9 to 13.0) | (90 to 320) | (0.4% to 1.6%) | (0.8 to 3.2) | (590 to 1 600) | (1.4% to 3.7%) | (2.8 to 8.0) |
| Latin America and the Caribbean | Latin America and the Caribbean | High HDI   | Dominican Republic | 310            | 3.0%           | 6.0           | 160         | 1.7%           | 2.9          | 470            | 2.4%           | 4.4          |
|                                 |                                 |            |                    | (190 to 420)   | (1.9% to 4.2%) | (3.8 to 8.3)  | (90 to 240) | (1.0% to 2.6%) | (1.5 to 4.7) | (280 to 660)   | (1.5% to 3.4%) | (2.6 to 6.4) |
| Latin America and the Caribbean | Latin America and the Caribbean | High HDI   | Ecuador            | 270            | 2.1%           | 3.2           | 160         | 1.0%           | 1.8          | 430            | 1.5%           | 2.5          |
|                                 |                                 |            |                    | (140 to 390)   | (1.1% to 3.1%) | (1.6 to 4.8)  | (80 to 260) | (0.5% to 1.7%) | (0.8 to 3.3) | (220 to 650)   | (0.8% to 2.3%) | (1.2 to 3.9) |
| Latin America and the Caribbean | Latin America and the Caribbean | Medium HDI | El Salvador        | 60             | 1.6%           | 2.1           | 40          | 0.7%           | 1.0          | 100            | 1.0%           | 1.4          |
|                                 |                                 |            |                    | (20 to 110)    | (0.6% to 2.7%) | (0.8 to 3.6)  | (10 to 60)  | (0.3% to 1.1%) | (0.3 to 1.8) | (40 to 170)    | (0.4% to 1.8%) | (0.5 to 2.6) |
| Latin America and the Caribbean | Latin America and the Caribbean | Missing    | France, Guadeloupe | 40             | 3.1%           | 10.1          | 10          | 1.9%           | 3.3          | 50             | 2.6%           | 6.3          |
|                                 |                                 |            |                    | (30 to 50)     | (2.5% to 3.9%) | (8.0 to 12.9) | (10 to 20)  | (1.3% to 2.6%) | (1.9 to 4.9) | (40 to 70)     | (2.0% to 3.4%) | (4.6 to 8.4) |
| Latin America and the Caribbean | Latin America and the Caribbean | Missing    | France, Martinique | 30             | 2.8%           | 9.0           | 20          | 2.1%           | 4.4          | 50             | 2.5%           | 6.5          |
|                                 |                                 |            |                    | (30 to 40)     | (2.2% to 3.4%) | (7.0 to 11.3) | (10 to 20)  | (1.4% to 2.8%) | (2.6 to 6.5) | (40 to 70)     | (1.9% to 3.2%) | (4.5 to 8.7) |
| Latin America and the Caribbean | Latin America and the Caribbean | Missing    | French Guyana      | 10             | 3.6%           | 8.7           | <5          | 1.7%           | 3.0          | 10             | 2.7%           | 5.8          |
|                                 |                                 |            |                    | (8 to 10)      | (2.7% to 4.3%) | (6.1 to 10.9) | (<5 to 5)   | (1.1% to 2.3%) | (1.7 to 4.4) | (10 to 20)     | (2.0% to 3.4%) | (3.9 to 7.6) |
| Latin America and the Caribbean | Latin America and the Caribbean | Medium HDI | Guatemala          | 150            | 2.0%           | 2.9           | 60          | 0.7%           | 1.0          | 210            | 1.3%           | 1.8          |
|                                 |                                 |            |                    | (50 to 280)    | (0.6% to 3.8%) | (0.9 to 5.5)  | (20 to 110) | (0.3% to 1.2%) | (0.3 to 1.8) | (70 to 390)    | (0.4% to 2.4%) | (0.6 to 3.4) |
| Latin America and the Caribbean | Latin America and the Caribbean | Medium HDI | Guyana             | 10             | 2.5%           | 3.7           | 7           | 1.1%           | 1.8          | 20             | 1.7%           | 2.7          |
|                                 |                                 |            |                    | (7 to 20)      | (1.4% to 3.3%) | (2.1 to 5.2)  | (<5 to 10)  | (0.6% to 1.7%) | (0.8 to 3.1) | (10 to 30)     | (1.0% to 2.4%) | (1.4 to 4.0) |
| Latin America and the Caribbean | Latin America and the Caribbean | Low HDI    | Haiti              | 200            | 3.3%           | 5.3           | 80          | 1.3%           | 1.8          | 280            | 2.3%           | 3.4          |
|                                 |                                 |            |                    | (120 to 290)   | (1.9% to 4.7%) | (3.1 to 7.8)  | (50 to 120) | (0.7% to 2.0%) | (1.0 to 2.9) | (160 to 410)   | (1.3% to 3.3%) | (1.9 to 5.1) |
| Latin America and the Caribbean | Latin America and the Caribbean | Medium HDI | Honduras           | 100            | 2.0%           | 3.4           | 30          | 0.6%           | 0.9          | 140            | 1.3%           | 2.0          |
|                                 |                                 |            |                    | (50 to 160)    | (0.9% to 3.2%) | (1.5 to 5.4)  | (20 to 60)  | (0.3% to 1.0%) | (0.4 to 1.6) | (60 to 220)    | (0.6% to 2.1%) | (0.9 to 3.3) |
| Latin America and the Caribbean | Latin America and the Caribbean | High HDI   | Jamaica            | 60             | 1.7%           | 3.5           | 30          | 0.8%           | 1.7          | 90             | 1.3%           | 2.5          |



|                                 |                                 |               |                                   |                  |                |                |                |                |              |                  |                |               |
|---------------------------------|---------------------------------|---------------|-----------------------------------|------------------|----------------|----------------|----------------|----------------|--------------|------------------|----------------|---------------|
|                                 |                                 |               |                                   | (30 to 90)       | (0.7% to 2.6%) | (1.4 to 5.4)   | (10 to 50)     | (0.4% to 1.5%) | (0.6 to 3.1) | (40 to 150)      | (0.5% to 2.0%) | (1.0 to 4.2)  |
| Latin America and the Caribbean | Latin America and the Caribbean | High HDI      | Mexico                            | 2 200            | 2.6%           | 3.7            | 1 400          | 1.3%           | 2.0          | 3 600            | 1.9%           | 2.8           |
|                                 |                                 |               |                                   | (1 400 to 3 000) | (1.6% to 3.6%) | (2.2 to 5.1)   | (740 to 2 100) | (0.7% to 2.1%) | (1.0 to 3.4) | (2 100 to 5 200) | (1.1% to 2.8%) | (1.6 to 4.2)  |
| Latin America and the Caribbean | Latin America and the Caribbean | Medium HDI    | Nicaragua                         | 90               | 2.6%           | 3.9            | 40             | 0.9%           | 1.4          | 130              | 1.7%           | 2.5           |
|                                 |                                 |               |                                   | (40 to 150)      | (1.2% to 4.2%) | (1.8 to 6.3)   | (20 to 70)     | (0.4% to 1.5%) | (0.6 to 2.4) | (60 to 210)      | (0.8% to 2.7%) | (1.1 to 4.1)  |
| Latin America and the Caribbean | Latin America and the Caribbean | High HDI      | Panama                            | 110              | 2.8%           | 4.7            | 60             | 1.5%           | 2.4          | 160              | 2.2%           | 3.5           |
|                                 |                                 |               |                                   | (70 to 130)      | (2.0% to 3.5%) | (3.3 to 6.1)   | (40 to 90)     | (1.0% to 2.4%) | (1.3 to 4.0) | (110 to 220)     | (1.5% to 3.0%) | (2.2 to 5.0)  |
| Latin America and the Caribbean | Latin America and the Caribbean | High HDI      | Paraguay                          | 260              | 4.1%           | 8.6            | 100            | 1.7%           | 3.4          | 360              | 2.9%           | 6.0           |
|                                 |                                 |               |                                   | (180 to 320)     | (2.9% to 5.2%) | (5.9 to 11.0)  | (60 to 160)    | (1.0% to 2.5%) | (1.6 to 5.7) | (240 to 480)     | (1.9% to 3.8%) | (3.7 to 8.3)  |
| Latin America and the Caribbean | Latin America and the Caribbean | High HDI      | Peru                              | 750              | 2.4%           | 4.7            | 480            | 1.3%           | 2.7          | 1 200            | 1.8%           | 3.6           |
|                                 |                                 |               |                                   | (450 to 1 000)   | (1.5% to 3.2%) | (2.7 to 6.4)   | (270 to 710)   | (0.7% to 2.0%) | (1.3 to 4.4) | (720 to 1 700)   | (1.1% to 2.6%) | (2.0 to 5.3)  |
| Latin America and the Caribbean | Latin America and the Caribbean | Missing       | Puerto Rico                       | 290              | 4.4%           | 10.5           | 120            | 2.1%           | 3.7          | 410              | 3.3%           | 6.7           |
|                                 |                                 |               |                                   | (230 to 360)     | (3.4% to 5.4%) | (7.9 to 13.1)  | (80 to 160)    | (1.5% to 2.8%) | (2.3 to 5.3) | (310 to 520)     | (2.5% to 4.2%) | (4.8 to 8.7)  |
| Latin America and the Caribbean | Latin America and the Caribbean | High HDI      | Saint Lucia                       | 9                | 3.5%           | 8.5            | <5             | 2.2%           | 3.4          | 10               | 3.0%           | 5.8           |
|                                 |                                 |               |                                   | (7 to 10)        | (2.7% to 4.3%) | (5.9 to 11.0)  | (<5 to 6)      | (1.4% to 3.2%) | (1.7 to 5.3) | (10 to 20)       | (2.2% to 3.8%) | (3.7 to 8.0)  |
| Latin America and the Caribbean | Latin America and the Caribbean | High HDI      | Suriname                          | 20               | 3.1%           | 5.8            | 7              | 1.3%           | 2.1          | 20               | 2.2%           | 3.7           |
|                                 |                                 |               |                                   | (9 to 20)        | (1.8% to 4.4%) | (3.2 to 8.3)   | (<5 to 10)     | (0.7% to 2.0%) | (1.0 to 3.5) | (10 to 30)       | (1.2% to 3.2%) | (1.9 to 5.6)  |
| Latin America and the Caribbean | Latin America and the Caribbean | High HDI      | Trinidad and Tobago               | 50               | 2.6%           | 5.8            | 30             | 1.4%           | 2.7          | 80               | 2.0%           | 4.1           |
|                                 |                                 |               |                                   | (30 to 70)       | (1.6% to 3.4%) | (3.5 to 7.8)   | (20 to 40)     | (0.8% to 2.1%) | (1.4 to 4.4) | (50 to 110)      | (1.2% to 2.8%) | (2.4 to 5.9)  |
| Latin America and the Caribbean | Latin America and the Caribbean | Very high HDI | Uruguay                           | 380              | 4.8%           | 15.0           | 170            | 2.4%           | 5.6          | 550              | 3.7%           | 9.7           |
|                                 |                                 |               |                                   | (260 to 460)     | (3.4% to 5.9%) | (10.5 to 18.4) | (100 to 250)   | (1.4% to 3.5%) | (3.0 to 8.8) | (370 to 710)     | (2.5% to 4.8%) | (6.3 to 12.9) |
| Latin America and the Caribbean | Latin America and the Caribbean | High HDI      | Venezuela, Bolivarian Republic of | 950              | 3.8%           | 6.4            | 520            | 1.8%           | 3.0          | 1 500            | 2.7%           | 4.6           |
|                                 |                                 |               |                                   | (670 to 1 200)   | (2.7% to 4.8%) | (4.4 to 8.1)   | (290 to 770)   | (1.0% to 2.6%) | (1.6 to 4.8) | (960 to 2 000)   | (1.8% to 3.6%) | (2.9 to 6.3)  |
| North America                   | North America                   | Very high HDI | Canada                            | 4 600            | 4.2%           | 12.9           | 2 400          | 2.3%           | 6.9          | 7 000            | 3.3%           | 9.8           |

|               |                                     |               |                          |                    |                |                |                    |                |               |                    |                |               |
|---------------|-------------------------------------|---------------|--------------------------|--------------------|----------------|----------------|--------------------|----------------|---------------|--------------------|----------------|---------------|
|               |                                     |               |                          | (3 300 to 5 600)   | (3.0% to 5.1%) | (9.3 to 16.0)  | (1 500 to 3 400)   | (1.5% to 3.3%) | (4.0 to 10.4) | (4 900 to 9 000)   | (2.3% to 4.2%) | (6.5 to 13.0) |
| North America | North America                       | Very high HDI | United States of America | 33 900             | 3.8%           | 12.6           | 18 800             | 2.2%           | 6.7           | 52 700             | 3.0%           | 9.5           |
|               |                                     |               |                          | (22 900 to 43 300) | (2.6% to 4.9%) | (8.4 to 16.2)  | (11 500 to 26 800) | (1.3% to 3.1%) | (3.7 to 10.3) | (34 400 to 70 100) | (2.0% to 4.0%) | (5.9 to 13.1) |
| Oceania       | Australia and New Zealand           | Very high HDI | Australia                | 3 700              | 4.9%           | 17.6           | 2 200              | 3.3%           | 10.5          | 5 800              | 4.1%           | 13.9          |
|               |                                     |               |                          | (2 800 to 4 500)   | (3.7% to 6.0%) | (12.9 to 21.7) | (1 400 to 3 100)   | (2.2% to 4.6%) | (6.1 to 15.9) | (4 200 to 7 500)   | (3.0% to 5.3%) | (9.4 to 18.7) |
| Oceania       | Australia and New Zealand           | Very high HDI | New Zealand              | 570                | 4.2%           | 13.8           | 370                | 3.1%           | 9.1           | 940                | 3.7%           | 11.3          |
|               |                                     |               |                          | (410 to 700)       | (3.1% to 5.2%) | (9.7 to 17.0)  | (230 to 530)       | (1.9% to 4.3%) | (5.1 to 14.0) | (640 to 1 200)     | (2.5% to 4.8%) | (7.3 to 15.4) |
| Oceania       | Melanesia, Micronesia and Polynesia | High HDI      | Fiji                     | 10                 | 2.3%           | 3.0            | 5                  | 0.6%           | 1.1           | 20                 | 1.2%           | 2.0           |
|               |                                     |               |                          | (5 to 20)          | (0.8% to 4.0%) | (1.1 to 5.4)   | (<5 to 9)          | (0.2% to 1.0%) | (0.4 to 2.0)  | (7 to 30)          | (0.5% to 2.2%) | (0.7 to 3.6)  |
| Oceania       | Melanesia, Micronesia and Polynesia | Missing       | France, New Caledonia    | 7                  | 1.1%           | 3.7            | <5                 | 0.3%           | 1.0           | 8                  | 0.7%           | 2.3           |
|               |                                     |               |                          | (<5 to 10)         | (0.2% to 1.6%) | (0.8 to 5.7)   | (<5 to <5)         | (0.1% to 0.5%) | (0.3 to 1.5)  | (<5 to 10)         | (0.2% to 1.1%) | (0.5 to 3.6)  |
| Oceania       | Melanesia, Micronesia and Polynesia | Missing       | French Polynesia         | 5                  | 1.1%           | 3.0            | <5                 | 0.3%           | 0.6           | 6                  | 0.7%           | 1.8           |
|               |                                     |               |                          | (<5 to 8)          | (0.2% to 1.6%) | (0.6 to 4.6)   | (<5 to <5)         | (0.1% to 0.4%) | (0.2 to 1.0)  | (<5 to 9)          | (0.2% to 1.1%) | (0.4 to 2.8)  |
| Oceania       | Melanesia, Micronesia and Polynesia | Missing       | Guam                     | <5                 | 1.7%           | 3.6            | <5                 | 0.3%           | 0.5           | <5                 | 1.0%           | 2.0           |
|               |                                     |               |                          | (<5 to 6)          | (0.4% to 2.7%) | (0.8 to 6.0)   | (<5 to <5)         | (0.1% to 0.4%) | (0.1 to 0.8)  | (<5 to 7)          | (0.2% to 1.6%) | (0.4 to 3.4)  |
| Oceania       | Melanesia, Micronesia and Polynesia | Low HDI       | Papua New Guinea         | 120                | 2.4%           | 4.8            | 20                 | 0.4%           | 0.7           | 140                | 1.3%           | 2.6           |
|               |                                     |               |                          | (6 to 260)         | (0.1% to 5.2%) | (0.2 to 10.3)  | (<5 to 50)         | (0.0% to 0.7%) | (0.1 to 1.5)  | (8 to 310)         | (0.1% to 2.7%) | (0.1 to 5.6)  |
| Oceania       | Melanesia, Micronesia and Polynesia | High HDI      | Samoa                    | <5                 | 2.1%           | 4.6            | <5                 | 0.6%           | 1.4           | 5                  | 1.3%           | 2.9           |
|               |                                     |               |                          | (<5 to 5)          | (0.9% to 3.1%) | (2.0 to 7.2)   | (<5 to <5)         | (0.2% to 1.0%) | (0.5 to 2.5)  | (<5 to 7)          | (0.5% to 2.0%) | (1.2 to 4.8)  |
| Oceania       | Melanesia, Micronesia and Polynesia | Medium HDI    | Solomon Islands          | <5                 | 1.3%           | 1.6            | <5                 | 0.3%           | 0.4           | <5                 | 0.7%           | 1.0           |
|               |                                     |               |                          | (<5 to 8)          | (0.1% to 3.1%) | (0.2 to 4.1)   | (<5 to <5)         | (0.0% to 0.6%) | (0.1 to 1.0)  | (<5 to 10)         | (0.1% to 1.6%) | (0.1 to 2.5)  |
| Oceania       | Melanesia, Micronesia and Polynesia | Medium HDI    | Vanuatu                  | <5                 | 1.2%           | 1.2            | <5                 | 0.2%           | 0.2           | <5                 | 0.7%           | 0.7           |
|               |                                     |               |                          | (<5 to <5)         | (0.2% to 3.0%) | (0.1 to 3.2)   | (<5 to <5)         | (0.0% to 0.4%) | (0.0 to 0.5)  | (<5 to <5)         | (0.1% to 1.7%) | (0.1 to 1.8)  |

Numbers in parentheses are 95% Uncertainty Intervals. Cases may not sum due to rounding. PAF, Population-attributable Fraction; ASIR, Age-standardised incidence rate of alcohol-attributable cases.

Appendix table 5. Global number of alcohol-attributable cancer cases in 2020, by alcohol consumption category, world region, Human Development Index, and sex. Number of cases suppressed if less than five.

| World Region    | Level of alcohol consumption (grams ethanol per day) | Alcohol-attributable cases |                    |                     | Percentage of total alcohol-attributable cases |         |       |
|-----------------|------------------------------------------------------|----------------------------|--------------------|---------------------|------------------------------------------------|---------|-------|
|                 |                                                      | Males                      | Females            | Total               | Males                                          | Females | Total |
| <b>Africa</b>   |                                                      |                            |                    |                     |                                                |         |       |
| Eastern Africa  | Moderate (<20 g)                                     | 550                        | 650                | 1 200               | 9.1%                                           | 28.4%   | 14.4% |
|                 |                                                      | (430 to 1 100)             | (490 to 3 000)     | (920 to 4 000)      |                                                |         |       |
|                 | Risky (20-60 g)                                      | 1 900                      | 960                | 2 800               | 30.9%                                          | 42.0%   | 34.0% |
|                 |                                                      | (1 400 to 2 100)           | (640 to 1 300)     | (2 000 to 3 400)    |                                                |         |       |
|                 | Heavy (>60 g)                                        | 3 600                      | 680                | 4 300               | 60.0%                                          | 29.5%   | 51.6% |
|                 |                                                      | (2 200 to 5 400)           | (420 to 1 200)     | (2 600 to 6 600)    |                                                |         |       |
|                 | Middle Africa                                        | 240                        | 270                | 510                 | 12.5%                                          | 36.6%   | 19.2% |
|                 |                                                      | (150 to 300)               | (170 to 350)       | (330 to 640)        |                                                |         |       |
|                 | Risky (20-60 g)                                      | 690                        | 330                | 1 000               | 36.2%                                          | 44.2%   | 38.4% |
|                 |                                                      | (420 to 870)               | (210 to 470)       | (630 to 1 300)      |                                                |         |       |
|                 | Heavy (>60 g)                                        | 980                        | 140                | 1 100               | 51.3%                                          | 19.2%   | 42.3% |
|                 |                                                      | (600 to 1 500)             | (70 to 260)        | (670 to 1 800)      |                                                |         |       |
| Northern Africa | Moderate (<20 g)                                     | 170                        | 80                 | 260                 | 21.2%                                          | 46.8%   | 25.8% |
|                 |                                                      | (30 to 9 200)              | (20 to 560)        | (50 to 9 800)       |                                                |         |       |
|                 | Risky (20-60 g)                                      | 360                        | 70                 | 430                 | 44.2%                                          | 37.0%   | 42.9% |
|                 |                                                      | (70 to 710)                | (30 to 160)        | (100 to 870)        |                                                |         |       |
|                 | Heavy (>60 g)                                        | 280                        | 30                 | 310                 | 34.6%                                          | 16.1%   | 31.3% |
|                 |                                                      | (80 to 1 400)              | (10 to 120)        | (90 to 1 600)       |                                                |         |       |
|                 | Southern Africa                                      | 110                        | 200                | 310                 | 3.9%                                           | 14.6%   | 7.4%  |
|                 |                                                      | (80 to 150)                | (150 to 260)       | (230 to 400)        |                                                |         |       |
|                 | Risky (20-60 g)                                      | 660                        | 570                | 1 200               | 23.2%                                          | 42.0%   | 29.3% |
|                 |                                                      | (550 to 740)               | (400 to 710)       | (960 to 1 400)      |                                                |         |       |
|                 | Heavy (>60 g)                                        | 2 100                      | 590                | 2 700               | 72.9%                                          | 43.4%   | 63.4% |
|                 |                                                      | (1 400 to 2 700)           | (230 to 1 000)     | (1 600 to 3 700)    |                                                |         |       |
| Western Africa  | Moderate (<20 g)                                     | 290                        | 530                | 820                 | 6.6%                                           | 20.0%   | 11.7% |
|                 |                                                      | (170 to 540)               | (380 to 730)       | (550 to 1 300)      |                                                |         |       |
|                 | Risky (20-60 g)                                      | 1 200                      | 1 100              | 2 300               | 27.6%                                          | 42.8%   | 33.4% |
|                 |                                                      | (750 to 1 500)             | (830 to 1 500)     | (1 600 to 2 900)    |                                                |         |       |
|                 | Heavy (>60 g)                                        | 2 900                      | 990                | 3 900               | 65.8%                                          | 37.2%   | 55.0% |
|                 |                                                      | (1 600 to 4 500)           | (520 to 1 600)     | (2 100 to 6 100)    |                                                |         |       |
|                 | <b>Asia</b>                                          |                            |                    |                     |                                                |         |       |
| Eastern Asia    | Moderate (<20 g)                                     | 27 800                     | 22 600             | 50 400              | 10.1%                                          | 40.2%   | 15.2% |
|                 |                                                      | (18 000 to 38 800)         | (17 300 to 27 400) | (35 300 to 66 100)  |                                                |         |       |
|                 | Risky (20-60 g)                                      | 107 900                    | 28 200             | 136 100             | 39.1%                                          | 50.1%   | 41.0% |
|                 |                                                      | (79 900 to 122 400)        | (14 400 to 41 600) | (94 300 to 164 000) |                                                |         |       |
|                 | Heavy (>60 g)                                        | 140 200                    | 5 400              | 145 700             | 50.8%                                          | 9.7%    | 43.9% |
|                 |                                                      |                            |                    |                     |                                                |         |       |
|                 |                                                      |                            |                    |                     |                                                |         |       |

|                            |                  |                     |                   |                     |       |       |       |
|----------------------------|------------------|---------------------|-------------------|---------------------|-------|-------|-------|
|                            |                  | (54 900 to 231 600) | (1 100 to 16 900) | (56 000 to 248 500) |       |       |       |
| South-Central Asia         | Moderate (<20 g) | 5 800               | 3 200             | 8 900               | 9.8%  | 35.4% | 13.1% |
|                            |                  | (4 300 to 63 900)   | (2 500 to 45 700) | (6 800 to 109 600)  |       |       |       |
|                            | Risky (20-60 g)  | 20 200              | 4 300             | 24 500              | 34.2% | 48.4% | 36.0% |
|                            |                  | (12 800 to 23 300)  | (1 200 to 6 600)  | (13 900 to 29 900)  |       |       |       |
|                            | Heavy (>60 g)    | 33 200              | 1 400             | 34 600              | 56.1% | 16.2% | 50.8% |
|                            |                  | (6 300 to 58 200)   | (330 to 5 000)    | (6 600 to 63 200)   |       |       |       |
| South-Eastern Asia         | Moderate (<20 g) | 2 800               | 1 900             | 4 600               | 12.1% | 39.6% | 16.8% |
|                            |                  | (1 700 to 3 500)    | (1 300 to 2 300)  | (3 000 to 5 800)    |       |       |       |
|                            | Risky (20-60 g)  | 8 800               | 2 200             | 11 100              | 38.4% | 47.5% | 39.9% |
|                            |                  | (5 800 to 11 100)   | (1 500 to 3 100)  | (7 300 to 14 200)   |       |       |       |
|                            | Heavy (>60 g)    | 11 400              | 610               | 12 000              | 49.6% | 12.9% | 43.3% |
|                            |                  | (5 900 to 19 300)   | (250 to 1 400)    | (6 200 to 20 600)   |       |       |       |
| Western Asia               | Moderate (<20 g) | 140                 | 230               | 370                 | 6.2%  | 30.6% | 12.3% |
|                            |                  | (110 to 2 000)      | (170 to 5 000)    | (280 to 7 000)      |       |       |       |
|                            | Risky (20-60 g)  | 680                 | 310               | 990                 | 30.3% | 41.1% | 33.0% |
|                            |                  | (500 to 820)        | (190 to 410)      | (690 to 1 200)      |       |       |       |
|                            | Heavy (>60 g)    | 1 400               | 210               | 1 600               | 63.5% | 28.3% | 54.7% |
|                            |                  | (700 to 2 100)      | (70 to 440)       | (770 to 2 600)      |       |       |       |
| <b>Europe</b>              |                  |                     |                   |                     |       |       |       |
| Central and Eastern Europe | Moderate (<20 g) | 1 800               | 3 700             | 5 500               | 3.6%  | 17.1% | 7.7%  |
|                            |                  | (1 500 to 2 100)    | (2 800 to 4 500)  | (4 300 to 6 600)    |       |       |       |
|                            | Risky (20-60 g)  | 13 300              | 10 400            | 23 700              | 26.6% | 48.3% | 33.1% |
|                            |                  | (11 700 to 14 300)  | (8 400 to 12 100) | (20 000 to 26 400)  |       |       |       |
|                            | Heavy (>60 g)    | 34 800              | 7 400             | 42 200              | 69.7% | 34.6% | 59.2% |
|                            |                  | (27 700 to 40 900)  | (4 800 to 10 800) | (32 400 to 51 700)  |       |       |       |
| Northern Europe            | Moderate (<20 g) | 620                 | 2 500             | 3 100               | 4.0%  | 26.8% | 12.4% |
|                            |                  | (480 to 740)        | (1 900 to 3 000)  | (2 300 to 3 700)    |       |       |       |
|                            | Risky (20-60 g)  | 5 200               | 4 800             | 10 000              | 33.3% | 52.8% | 40.5% |
|                            |                  | (4 500 to 5 600)    | (3 600 to 6 000)  | (8 000 to 11 700)   |       |       |       |
|                            | Heavy (>60 g)    | 9 800               | 1 900             | 11 700              | 62.8% | 20.4% | 47.1% |
|                            |                  | (7 200 to 12 200)   | (960 to 3 400)    | (8 200 to 15 600)   |       |       |       |
| Southern Europe            | Moderate (<20 g) | 1 200               | 3 100             | 4 300               | 5.4%  | 33.0% | 13.3% |
|                            |                  | (910 to 1 500)      | (2 300 to 3 800)  | (3 200 to 5 300)    |       |       |       |
|                            | Risky (20-60 g)  | 8 500               | 4 800             | 13 300              | 36.8% | 51.8% | 41.1% |
|                            |                  | (7 000 to 9 400)    | (3 400 to 6 200)  | (10 400 to 15 600)  |       |       |       |
|                            | Heavy (>60 g)    | 13 400              | 1 400             | 14 800              | 57.8% | 15.2% | 45.6% |
|                            |                  | (9 600 to 17 200)   | (850 to 2 400)    | (10 500 to 19 700)  |       |       |       |
| Western Europe             | Moderate (<20 g) | 1 600               | 5 000             | 6 700               | 4.7%  | 27.3% | 12.6% |
|                            |                  | (1 200 to 1 900)    | (3 900 to 6 100)  | (5 100 to 8 000)    |       |       |       |
|                            | Risky (20-60 g)  | 11 200              | 9 700             | 20 900              | 32.5% | 52.6% | 39.5% |

|                                        |                  |                     |                    |                      |       |       |       |
|----------------------------------------|------------------|---------------------|--------------------|----------------------|-------|-------|-------|
|                                        |                  | (9 600 to 12 100)   | (7 600 to 11 900)  | (17 200 to 24 000)   |       |       |       |
|                                        | Heavy (>60 g)    | 21 600              | 3 700              | 25 300               | 62.8% | 20.1% | 47.9% |
|                                        |                  | (16 100 to 26 700)  | (2 100 to 6 000)   | (18 200 to 32 700)   |       |       |       |
| <b>Latin America and the Caribbean</b> |                  |                     |                    |                      |       |       |       |
| Latin America and the Caribbean        | Moderate (<20 g) | 1 700               | 4 000              | 5 700                | 6.5%  | 31.4% | 14.4% |
|                                        |                  | (1 300 to 2 100)    | (2 900 to 5 000)   | (4 300 to 7 100)     |       |       |       |
|                                        | Risky (20-60 g)  | 9 300               | 6 500              | 15 800               | 34.9% | 51.8% | 40.3% |
|                                        |                  | (7 800 to 10 300)   | (4 600 to 8 400)   | (12 400 to 18 600)   |       |       |       |
|                                        | Heavy (>60 g)    | 15 700              | 2 100              | 17 800               | 58.7% | 16.7% | 45.3% |
|                                        |                  | (10 500 to 20 700)  | (1 100 to 4 200)   | (11 500 to 24 900)   |       |       |       |
| <b>North America</b>                   |                  |                     |                    |                      |       |       |       |
| North America                          | Moderate (<20 g) | 2 300               | 7 200              | 9 500                | 6.0%  | 34.2% | 16.0% |
|                                        |                  | (1 600 to 2 900)    | (5 400 to 9 000)   | (7 100 to 11 900)    |       |       |       |
|                                        | Risky (20-60 g)  | 13 800              | 11 000             | 24 800               | 35.8% | 52.1% | 41.6% |
|                                        |                  | (11 200 to 15 200)  | (6 500 to 15 200)  | (17 700 to 30 400)   |       |       |       |
|                                        | Heavy (>60 g)    | 22 400              | 2 900              | 25 300               | 58.2% | 13.7% | 42.4% |
|                                        |                  | (12 800 to 31 500)  | (850 to 6 800)     | (13 700 to 38 300)   |       |       |       |
| <b>Oceania</b>                         |                  |                     |                    |                      |       |       |       |
| Australia and New Zealand              | Moderate (<20 g) | 180                 | 700                | 880                  | 4.3%  | 27.5% | 13.0% |
|                                        |                  | (130 to 220)        | (530 to 870)       | (660 to 1 100)       |       |       |       |
|                                        | Risky (20-60 g)  | 1 400               | 1 400              | 2 700                | 32.9% | 53.1% | 40.5% |
|                                        |                  | (1 200 to 1 500)    | (940 to 1 800)     | (2 100 to 3 300)     |       |       |       |
|                                        | Heavy (>60 g)    | 2 700               | 500                | 3 200                | 62.8% | 19.4% | 46.4% |
|                                        |                  | (1 800 to 3 400)    | (190 to 1 000)     | (1 900 to 4 400)     |       |       |       |
| Melanesia, Micronesia and Polynesia    | Moderate (<20 g) | 30                  | 20                 | 60                   | 22.0% | 64.7% | 29.5% |
|                                        |                  | (10 to 40)          | (10 to 30)         | (10 to 70)           |       |       |       |
|                                        | Risky (20-60 g)  | 80                  | 10                 | 90                   | 49.6% | 32.9% | 46.7% |
|                                        |                  | (10 to 110)         | (<5 to 30)         | (10 to 140)          |       |       |       |
|                                        | Heavy (>60 g)    | 40                  | <5                 | 50                   | 28.4% | 2.4%  | 23.9% |
|                                        |                  | (10 to 180)         | (<5 to 10)         | (10 to 190)          |       |       |       |
| <b>HDI</b>                             |                  |                     |                    |                      |       |       |       |
| Very high HDI                          | Moderate (<20 g) | 12 500              | 27 400             | 39 900               | 6.2%  | 29.6% | 13.5% |
|                                        |                  | (9 700 to 14 700)   | (21 300 to 33 900) | (31 000 to 48 500)   |       |       |       |
|                                        | Risky (20-60 g)  | 71 100              | 47 100             | 118 300              | 35.0% | 50.9% | 40.0% |
|                                        |                  | (59 600 to 77 900)  | (36 800 to 56 500) | (96 400 to 134 400)  |       |       |       |
|                                        | Heavy (>60 g)    | 119 500             | 18 100             | 137 500              | 58.8% | 19.5% | 46.5% |
|                                        |                  | (91 000 to 147 100) | (13 600 to 26 100) | (104 600 to 173 100) |       |       |       |
| High HDI                               | Moderate (<20 g) | 27 300              | 23 500             | 50 800               | 9.4%  | 36.0% | 14.2% |
|                                        |                  | (18 100 to 40 700)  | (18 200 to 36 500) | (36 300 to 77 200)   |       |       |       |
|                                        | Risky (20-60 g)  | 108 500             | 32 700             | 141 200              | 37.2% | 50.3% | 39.6% |

|              |                  |                      |                     |                      |       |       |       |
|--------------|------------------|----------------------|---------------------|----------------------|-------|-------|-------|
|              |                  | (80 600 to 123 100)  | (18 600 to 45 900)  | (99 200 to 169 000)  |       |       |       |
|              | Heavy (>60 g)    | 155 600              | 8 900               | 164 500              | 53.4% | 13.6% | 46.1% |
|              |                  | (69 900 to 247 400)  | (4 500 to 21 000)   | (74 400 to 268 400)  |       |       |       |
| Medium HDI   | Moderate (<20 g) | 6 400                | 3 700               | 10 100               | 10.2% | 36.8% | 13.8% |
|              |                  | (4 900 to 62 700)    | (2 800 to 43 200)   | (7 700 to 105 900)   |       |       |       |
|              | Risky (20-60 g)  | 21 900               | 4 800               | 26 700               | 34.8% | 48.3% | 36.6% |
|              |                  | (14 400 to 25 000)   | (1 600 to 7 200)    | (16 100 to 32 200)   |       |       |       |
|              | Heavy (>60 g)    | 34 700               | 1 500               | 36 200               | 55.0% | 14.9% | 49.6% |
|              |                  | (7 600 to 59 800)    | (390 to 5 200)      | (8 000 to 65 000)    |       |       |       |
| Low HDI      | Moderate (<20 g) | 810                  | 1 100               | 1 900                | 8.6%  | 23.2% | 13.4% |
|              |                  | (630 to 3 800)       | (820 to 7 900)      | (1 400 to 11 600)    |       |       |       |
|              | Risky (20-60 g)  | 2 800                | 1 900               | 4 600                | 29.3% | 41.3% | 33.2% |
|              |                  | (2 000 to 3 200)     | (1 400 to 2 400)    | (3 400 to 5 600)     |       |       |       |
|              | Heavy (>60 g)    | 5 800                | 1 600               | 7 500                | 62.1% | 35.5% | 53.4% |
|              |                  | (3 800 to 8 400)     | (1 000 to 2 500)    | (4 800 to 10 900)    |       |       |       |
| Missing      | Moderate (<20 g) | 280                  | 180                 | 460                  | 16.0% | 46.5% | 21.3% |
|              |                  | (170 to 750)         | (120 to 2 400)      | (290 to 3 100)       |       |       |       |
|              | Risky (20-60 g)  | 820                  | 160                 | 980                  | 46.4% | 43.4% | 45.8% |
|              |                  | (450 to 1 100)       | (90 to 270)         | (540 to 1 300)       |       |       |       |
|              | Heavy (>60 g)    | 670                  | 40                  | 710                  | 37.7% | 10.1% | 32.8% |
|              |                  | (300 to 1 300)       | (20 to 80)          | (320 to 1 400)       |       |       |       |
| <b>World</b> | Moderate (<20 g) | 47 300               | 55 800              | 103 100              | 8.3%  | 32.3% | 13.9% |
|              |                  | (37 200 to 103 600)  | (45 400 to 103 600) | (82 600 to 207 200)  |       |       |       |
|              | Risky (20-60 g)  | 205 100              | 86 700              | 291 800              | 36.1% | 50.3% | 39.4% |
|              |                  | (161 700 to 226 700) | (66 000 to 106 400) | (227 700 to 333 100) |       |       |       |
|              | Heavy (>60 g)    | 316 300              | 30 100              | 346 400              | 55.6% | 17.4% | 46.7% |
|              |                  | (205 200 to 442 400) | (22 700 to 47 000)  | (227 900 to 489 400) |       |       |       |

Numbers in parentheses are 95% Uncertainty Intervals. Cases and percentages may not sum due to rounding. HDI, Human Development Index  
Missing HDI assigned to the following countries: French Guiana, French Polynesia, Guadeloupe, Guam, Korea (the Democratic People's Republic of), Martinique, New Caledonia, Puerto Rico, Reunion, and Somalia.

Appendix table 6. Global number of alcohol-attributable cancer cases, by 10 g per day increase in alcohol consumption and sex.

| Level of alcohol consumption (grams ethanol per day) | Alcohol-attributable cases |                    |                     | Percentage of total alcohol-attributable cases |         |       |
|------------------------------------------------------|----------------------------|--------------------|---------------------|------------------------------------------------|---------|-------|
|                                                      | Males                      | Females            | Total               | Males                                          | Females | Total |
| <10                                                  | 16 700                     | 24 600             | 41 300              | 2.9%                                           | 14.3%   | 5.6%  |
|                                                      | (14 300 to 75 400)         | (21 100 to 70 400) | (35 400 to 145 800) |                                                |         |       |
| 10-20                                                | 30 700                     | 31 100             | 61 800              | 5.4%                                           | 18.0%   | 8.3%  |
|                                                      | (22 900 to 38 100)         | (24 000 to 37 300) | (47 000 to 75 400)  |                                                |         |       |
| 20-30                                                | 49 900                     | 32 200             | 82 000              | 8.8%                                           | 18.6%   | 11.1% |
|                                                      | (40 300 to 56 000)         | (24 900 to 37 700) | (65 200 to 93 700)  |                                                |         |       |
| 30-40                                                | 52 500                     | 24 300             | 76 800              | 9.2%                                           | 14.1%   | 10.4% |
|                                                      | (41 400 to 57 600)         | (17 900 to 29 700) | (59 300 to 87 300)  |                                                |         |       |
| 40-50                                                | 52 300                     | 17 700             | 69 900              | 9.2%                                           | 10.2%   | 9.4%  |
|                                                      | (40 200 to 57 900)         | (13 000 to 22 700) | (53 300 to 80 600)  |                                                |         |       |
| 50-60                                                | 50 500                     | 12 600             | 63 100              | 8.9%                                           | 7.3%    | 8.5%  |
|                                                      | (37 000 to 57 500)         | (9 000 to 16 800)  | (46 000 to 74 400)  |                                                |         |       |
| 60-70                                                | 47 800                     | 9 000              | 56 700              | 8.4%                                           | 5.2%    | 7.7%  |
|                                                      | (34 200 to 56 500)         | (6 400 to 12 700)  | (40 600 to 69 200)  |                                                |         |       |
| 70-80                                                | 44 600                     | 6 400              | 50 900              | 7.8%                                           | 3.7%    | 6.9%  |
|                                                      | (30 400 to 54 600)         | (4 700 to 9 500)   | (35 100 to 64 100)  |                                                |         |       |
| 80-90                                                | 41 200                     | 4 500              | 45 800              | 7.3%                                           | 2.6%    | 6.2%  |
|                                                      | (26 900 to 53 600)         | (3 200 to 7 200)   | (30 100 to 60 800)  |                                                |         |       |
| 90-100                                               | 37 900                     | 3 200              | 41 100              | 6.7%                                           | 1.9%    | 5.5%  |
|                                                      | (24 600 to 51 500)         | (2 400 to 5 500)   | (27 100 to 57 000)  |                                                |         |       |
| 100-110                                              | 34 600                     | 2 300              | 37 000              | 6.1%                                           | 1.4%    | 5.0%  |
|                                                      | (21 700 to 49 000)         | (1 700 to 4 100)   | (23 500 to 53 200)  |                                                |         |       |
| 110-120                                              | 31 600                     | 1 700              | 33 300              | 5.6%                                           | 1.0%    | 4.5%  |
|                                                      | (20 600 to 47 900)         | (1 300 to 3 300)   | (21 900 to 51 200)  |                                                |         |       |
| 120-130                                              | 28 700                     | 1 300              | 30 000              | 5.1%                                           | 0.7%    | 4.0%  |
|                                                      | (17 600 to 45 700)         | (930 to 2 500)     | (18 600 to 48 100)  |                                                |         |       |
| 130-140                                              | 26 100                     | 940                | 27 100              | 4.6%                                           | 0.5%    | 3.7%  |
|                                                      | (16 000 to 44 300)         | (720 to 2 000)     | (16 700 to 46 300)  |                                                |         |       |
| 140-150                                              | 23 700                     | 710                | 24 400              | 4.2%                                           | 0.4%    | 3.3%  |
|                                                      | (14 000 to 43 400)         | (550 to 1 500)     | (14 500 to 44 800)  |                                                |         |       |

Numbers in parentheses are 95% Uncertainty Intervals. Cases and percentages may not sum due to rounding.

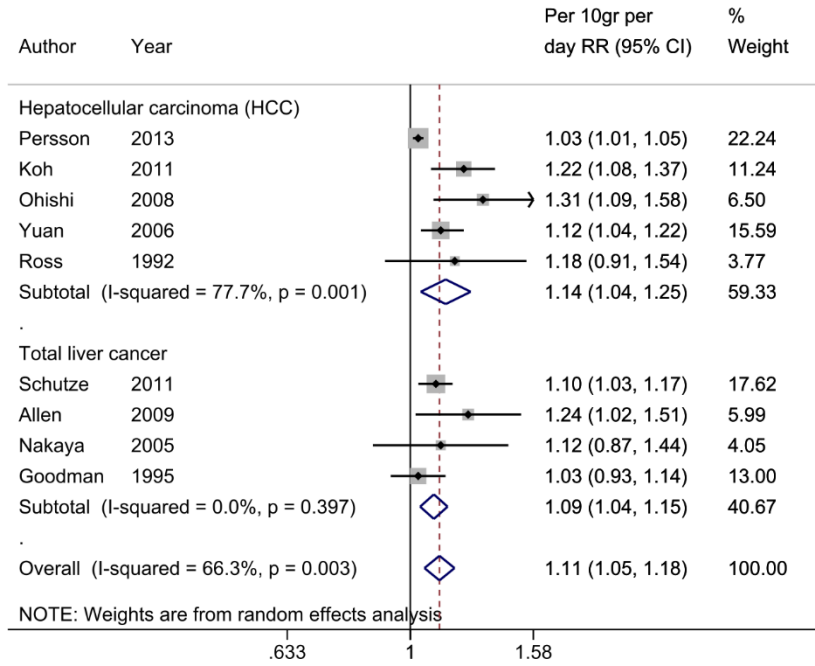

Appendix figure 1. Dose-response meta-analysis per 10 g per day of alcohol intake and liver cancer stratified by hepatocellular carcinoma (HCC) or total liver cancer.



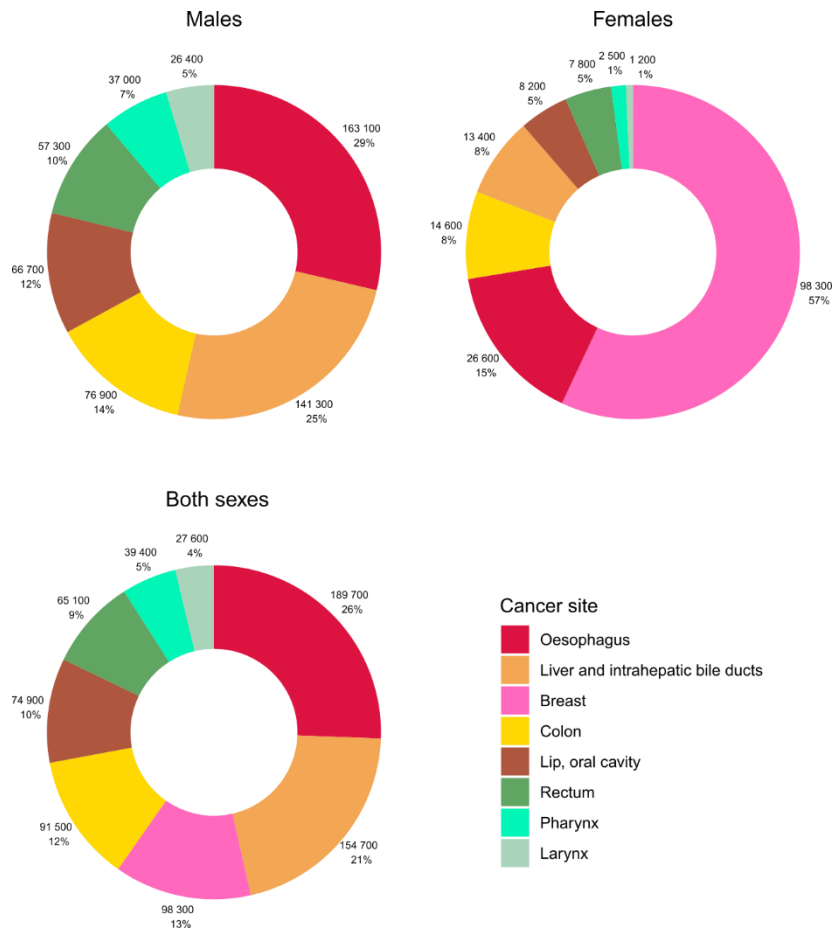

Appendix figure 2. Cancers attributable to alcohol consumption according to cancer site in males, females, and both sexes combined, in 2020.

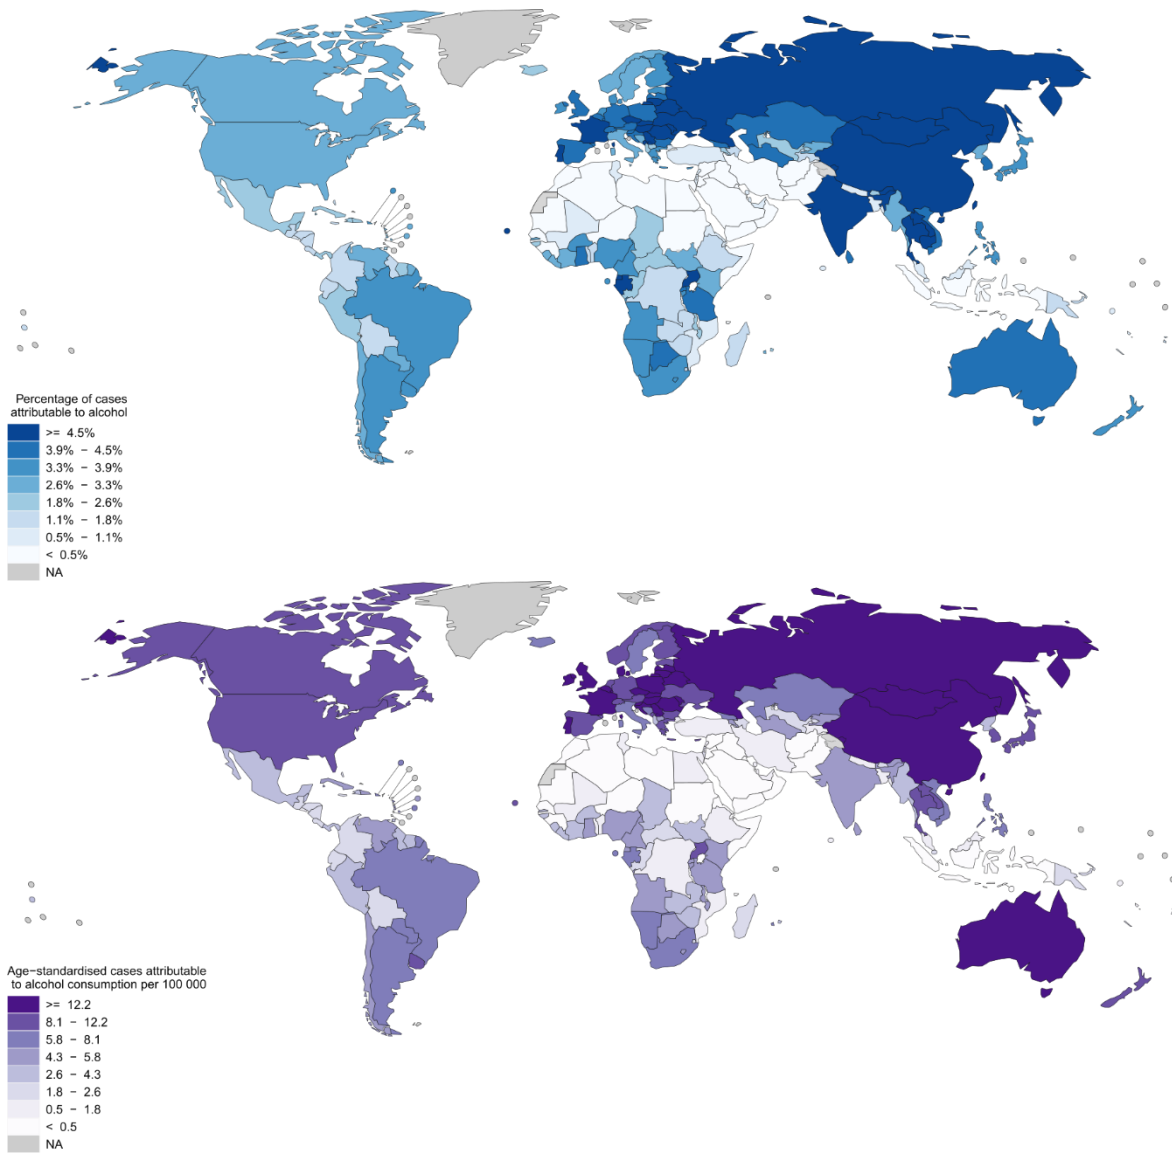

Appendix figure 3. Population attributable fraction and age-standardised incidence rate of alcohol-attributable cancer cases in both sexes combined in 2020, by country.

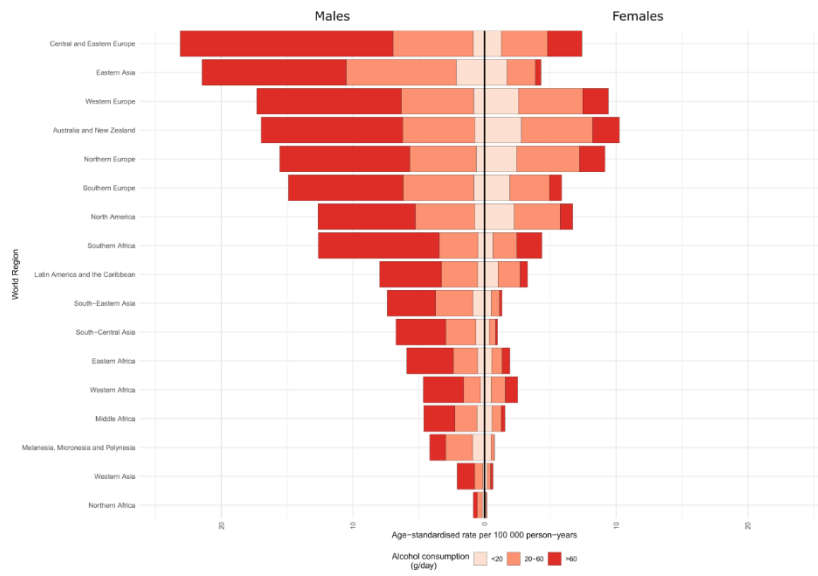

Appendix figure 4. Age-standardised incidence rate (ASIR) of alcohol-attributable cancer cases by alcohol consumption category, sex, and world region.

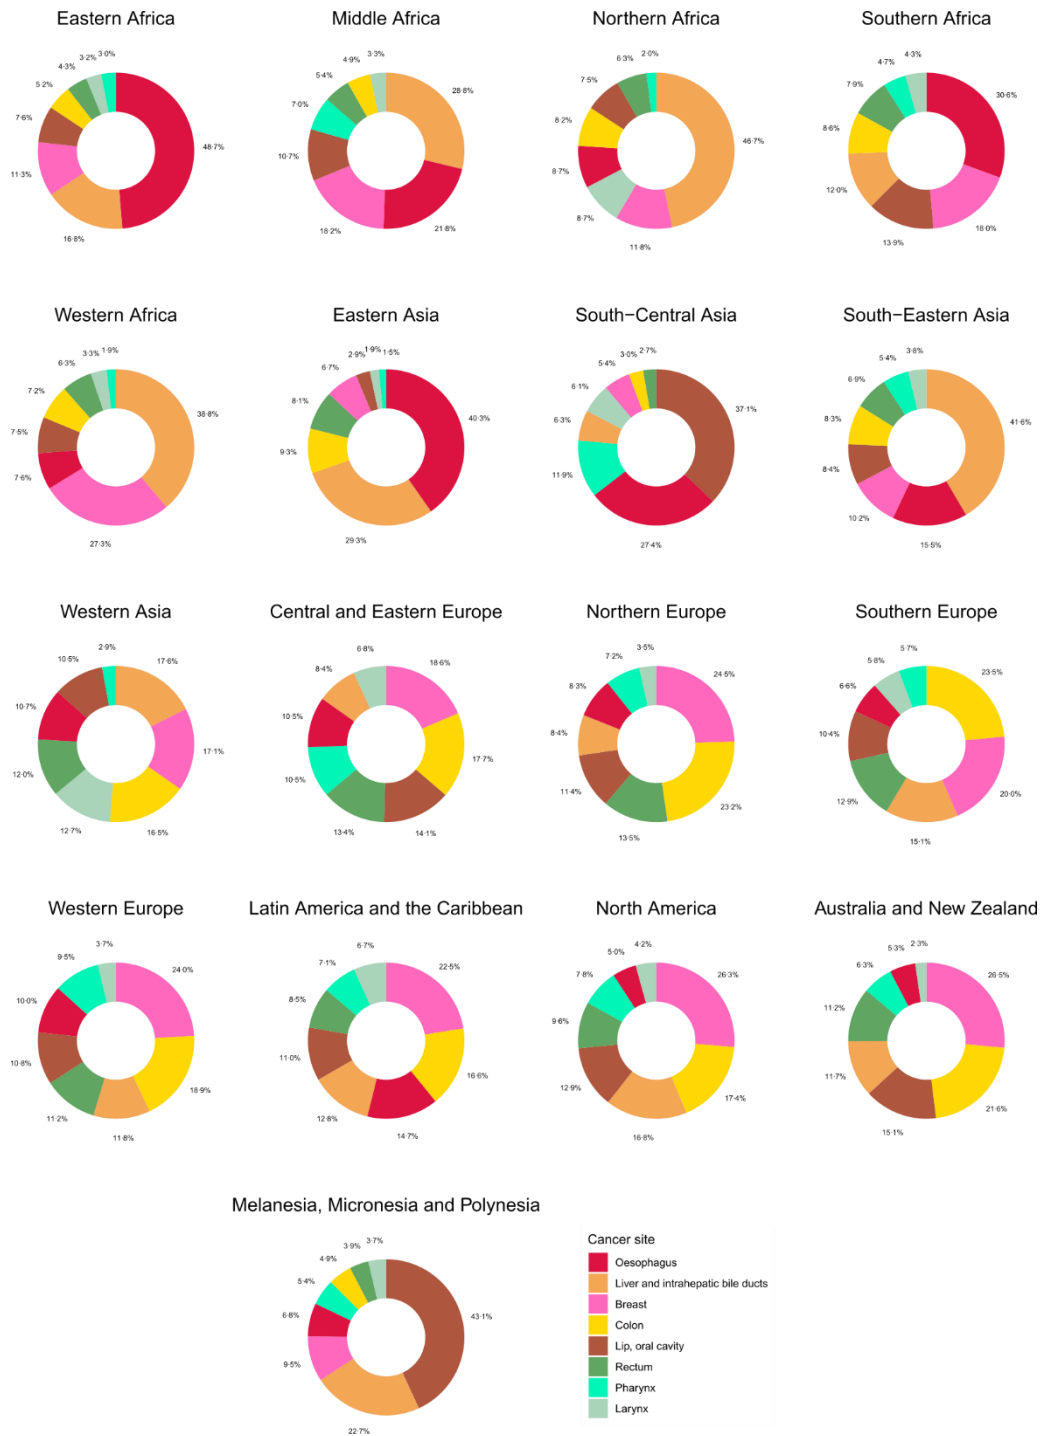

Appendix figure 5. Cancers attributable to alcohol consumption according to cancer site and region, both sexes combined, in 2020.

## References

1. Levin ML. The occurrence of lung cancer in man. *Acta-Unio Internationalis Contra Cancrum* 1953; **9**(3): 531-41.
2. Shield K, Manthey J, Rylett M, et al. National, regional, and global burdens of disease from 2000 to 2016 attributable to alcohol use: a comparative risk assessment study. *The Lancet Public Health* 2020; **5**(1): e51-e61.
3. Grundy A, Poirier AE, Khandwala F, McFadden A, Friedenreich CM, Brenner DR. Cancer incidence attributable to alcohol consumption in Alberta in 2012. *CMAJ Open* 2016; **4**(3): E507-E14.
4. Praud D, Rota M, Rehm J, et al. Cancer incidence and mortality attributable to alcohol consumption. *International journal of cancer* 2016; **138**(6): 1380-7.
5. International Agency for Research on Cancer. IARC Monographs on the Evaluation of Carcinogenic Risks to Humans, 2012.
6. Ferlay J, Ervik M, Lam F, et al. Global Cancer Observatory: Cancer Today. 2020. <https://gco.iarc.fr/today> (accessed 15/12 2020).
7. Ferlay J, Colombet M, Soerjomataram I, et al. Cancer statistics for the year 2020: an overview. *International journal of cancer* 2021; 1– 12. <https://doi.org/10.1002/ijc.33588>
8. Arnold M, Ferlay J, van Berge Henegouwen MI, Soerjomataram I. Global burden of oesophageal and gastric cancer by histology and subsite in 2018. *Gut* 2020; **69**(9): 1564-71.
9. World Cancer Research Fund/American Institute for Cancer Research. Diet, Nutrition, Physical Activity and Cancer: a Global Perspective. Continuous Update Project Expert Report, 2018.
10. World Cancer Research Fund International. Systematic Literature Review. The Associations between Food, Nutrition and Physical Activity and the Risk of Liver Cancer, 2015.
11. Bagnardi V, Rota M, Botteri E, et al. Alcohol consumption and site-specific cancer risk: a comprehensive dose–response meta-analysis. *British Journal Of Cancer* 2014; **112**: 580.
12. World Cancer Research Fund International. Systematic Literature Review. The Associations between Food, Nutrition and Physical Activity and the Risk of Colorectal Cancer, 2017.
13. Schütze M, Boeing H, Pischon T, et al. Alcohol attributable burden of incidence of cancer in eight European countries based on results from prospective cohort study. *BMJ* 2011; **342**: d1584.
14. Marron M, Boffetta P, Zhang Z-F, et al. Cessation of alcohol drinking, tobacco smoking and the reversal of head and neck cancer risk. *International journal of epidemiology* 2010; **39**(1): 182-96.
15. Corrao G, Bagnardi V, Zambon A, La Vecchia C. A meta-analysis of alcohol consumption and the risk of 15 diseases. *Preventive Medicine* 2004; **38**(5): 613-9.
16. Sarich P, Canfell K, Egger S, et al. Alcohol consumption, drinking patterns and cancer incidence in an Australian cohort of 226,162 participants aged 45 years and over. *British Journal of Cancer* 2021; **124**(2): 513-23.
17. Jankhotkaew J, Bundhamcharoen K, Suphanchaimat R, et al. Associations between alcohol consumption trajectory and deaths due to cancer, cardiovascular diseases and all-cause mortality: a 30-year follow-up cohort study in Thailand. *BMJ Open* 2020; **10**(12): e038198.
18. World Health Organization. Global Information System on Alcohol and Health. Geneva, Switzerland, 2019.
19. Poznyak V, Fleischmann A, Rekke D, Rylett M, Rehm J, Gmel G. The world health organization's global monitoring system on alcohol and health. *Alcohol Res* 2013; **35**(2): 244-9.
20. Probst C, Fleischmann A, Gmel G, et al. The global proportion and volume of unrecorded alcohol in 2015. *J Glob Health* 2019; **9**(1): 010421-.
21. Gmel G, Rehm J. Measuring Alcohol Consumption. *Contemporary Drug Problems* 2004; **31**(3): 467-540.
22. Stockwell T, Zhao J, Sherk A, Rehm J, Shield K, Naimi T. Underestimation of alcohol consumption in cohort studies and implications for alcohol's contribution to the global burden of disease. *Addiction* 2018; **113**(12): 2245-9.
23. Rehm J, Kehoe T, Gmel G, Stinson F, Grant B, Gmel G. Statistical modeling of volume of alcohol exposure for epidemiological studies of population health: the US example. *Population Health Metrics* 2010; **8**(1): 3.
24. Kehoe T, Gmel G, Shield KD, Gmel G, Rehm J. Determining the best population-level alcohol consumption model and its impact on estimates of alcohol-attributable harms. *Population Health Metrics* 2012; **10**(1): 6.
25. Gmel G, Shield KD, Kehoe-Chan TAK, Rehm J. The effects of capping the alcohol consumption distribution and relative risk functions on the estimated number of deaths attributable to alcohol consumption in the European Union in 2004. *BMC Medical Research Methodology* 2013; **13**(1): 24.
26. Bloomfield K, Stockwell T, Gmel G, Rehm N. International comparisons of alcohol consumption. *Alcohol Res Health* 2003; **27**(1): 95-109.
27. Doll R, Payne P, Waterhouse J. Cancer Incidence in Five Continents: A Technical Report. Berlin: Union for International Cancer Control, 1966.
28. Gmel G, Shield KD, Frick H, Kehoe T, Gmel G, Rehm J. Estimating uncertainty of alcohol-attributable fractions for infectious and chronic diseases. *BMC Medical Research Methodology* 2011; **11**(1): 48.
29. Koehler E, Brown E, Haneuse SJPA. On the Assessment of Monte Carlo Error in Simulation-Based Statistical Analyses. *Am Stat* 2009; **63**(2): 155-62.

30. World Cancer Research Fund International. Systematic Literature Review. The Associations between Food, Nutrition and Physical Activity and the Risk of Mouth, Pharynx and Larynx cancer, 2016.
31. World Cancer Research Fund International. Systematic Literature Review. The Associations between Food, Nutrition and Physical Activity and the Risk of Breast Cancer, 2017.
32. World Cancer Research Fund International. Systematic Literature Review. The Associations between Food, Nutrition and Physical Activity and the Risk of Pancreatic Cancer, 2012.
33. World Cancer Research Fund International. Systematic Literature Review. The Associations between Food, Nutrition and Physical Activity and the Risk of Stomach Cancer, 2015.
34. Shield KD, Marant Micallef C, Hill C, et al. New cancer cases in France in 2015 attributable to different levels of alcohol consumption. *Addiction* 2018; **113**(2): 247-56.
